# Supplementary material
Source: publisher figshare collection journal article supplement (https://acs.figshare.com/ndownloader/files/4423783)

# **SUPPORTING INFORMATION**

**for**

## **Asymmetric Hydrogenation of Bicyclic Ketones Catalyzed by BINAP/IPHAN–Ru(II) Complex**

Noriyoshi Arai, Masaya Akashi, Satoshi Sugizaki, Hirohito Ooka, Tsutomu Inoue,  
and Takeshi Ohkuma

Division of Chemical Process Engineering, Faculty of Engineering  
Hokkaido University, Sapporo, Hokkaido 060-8628, Japan

and

Odawara Research Center, Nippon Soda Co., Ltd.  
345 Takada, Odawara 250-0280, Japan

## CONTENTS

|                                                                                                            |         |
|------------------------------------------------------------------------------------------------------------|---------|
| (A) Preparation and Physical Data of <i>trans</i> -RuCl <sub>2</sub> (binap)(1,4-diamine) Complexes (3a–e) | Page 3  |
| (B) Asymmetric Hydrogenation of 3-Quinuclidinone (1a)                                                      | Page 5  |
| (C) Asymmetric Hydrogenation of Bicyclo[2.2.2]octan-2-one (1b)                                             | Page 5  |
| (D) Asymmetric Hydrogenation of (±)-3,4-Dihydro-1,4-ethanonaphthalen-2(1 <i>H</i> )-one [(±)-4]            | Page 6  |
| (E) Asymmetric Hydrogenation of (±)-Norcamphor [(±)-7]                                                     | Page 8  |
| (F) Asymmetric Hydrogenation of (±)-2-Diphenylmethyl-3-quinuclidinone [(±)-10]                             | Page 8  |
| (G) Comment on the Catalytic Cycle                                                                         | Page 10 |
| (H) References                                                                                             | Page 11 |
| (I) Spectral Charts                                                                                        | Page 12 |

(A) **Preparation and Physical Data of *trans*-RuCl<sub>2</sub>(binap)(1,4-diamine) complexes (3a–e)**

The preparative method for these complexes was previously described.<sup>1</sup> Their physical properties are as follows:

***trans*-RuCl<sub>2</sub>[(*R*)-binap][(*S*)-ipban] [(*R,S*)-3a].** IR (ATR) 3326, 3053, 1433, 1087, 1075, 1021, 741, 697 cm<sup>-1</sup>. <sup>1</sup>H NMR (300 MHz, CDCl<sub>3</sub>) δ 1.27 (s, 6H), 2.43–2.47 (br m, 2H), 2.57–2.75 (m, 4H), 2.93 (br s, 2H), 3.67–3.70 (m, 2H), 6.27 (d, 2H, *J* = 8.2 Hz), 6.47 (br m, 6H), 6.67–6.72 (t-like m, 2H), 7.12–7.17 (t-like m, 2H), 7.39 (br m, 6H), 7.52 (d, 2H, *J* = 8.0 Hz), 7.62 (br m, 4H), 7.73 (d, 2H, *J* = 8.5 Hz), 7.91 (br, m, 4H), 8.25–8.30 (m, 2H). <sup>31</sup>P NMR (121 MHz, CDCl<sub>3</sub>) δ 46.5 (s). HRMS (ESI<sup>+</sup>) *m/z* 954.1606 (M<sup>+</sup>), calcd for C<sub>51</sub>H<sub>48</sub><sup>35</sup>Cl<sub>2</sub>N<sub>2</sub>O<sub>2</sub>P<sub>2</sub><sup>102</sup>Ru: 954.1612.

***trans*-RuCl<sub>2</sub>[(*S*)-binap][(*S*)-ipban] [(*S,S*)-3a].** IR (ATR) 3323, 3054, 1434, 1087, 1023, 741, 697 cm<sup>-1</sup>. <sup>1</sup>H NMR (300 MHz, CDCl<sub>3</sub>) δ 1.29 (s, 6H), 2.07 (br m, 2H), 2.67–2.70 (br m, 2H), 2.85 (br m, 2H), 3.06–3.08 (br m, 2H), 3.72–3.74 (m, 2H), 6.28 (d, 2H, *J* = 8.7 Hz), 6.48 (br m, 6H), 6.68–6.73 (t-like m, 2H), 7.13–7.17 (t-like m, 2H), 7.39 (br m, 6H), 7.52 (d, 2H, *J* = 8.0 Hz), 7.61 (br m, 4H), 7.71 (d, 2H, *J* = 8.7 Hz), 7.89 (br, m, 4H), 8.23–8.27 (m, 2H). <sup>31</sup>P NMR (121 MHz, CDCl<sub>3</sub>) δ 46.5 (s). HRMS (ESI<sup>+</sup>) *m/z* 954.1617 (M<sup>+</sup>), calcd for C<sub>51</sub>H<sub>48</sub><sup>35</sup>Cl<sub>2</sub>N<sub>2</sub>O<sub>2</sub>P<sub>2</sub><sup>102</sup>Ru: 954.1612.

***trans*-RuCl<sub>2</sub>[(*S*)-binap][(*R*)-iphan] [(*S,R*)-3b].** IR (KBr-disk) 3311, 3055, 1569, 1482, 1433, 1370, 1057, 1035, 741, 697 cm<sup>-1</sup>. <sup>1</sup>H NMR (300 MHz, CDCl<sub>3</sub>) δ 0.54 (d, 6H, *J* = 6.4 Hz), 1.24 (s, 6H), 2.66–2.75 (br m, 4H), 3.04 (br m, 2H), 3.47–3.51 (m, 2H), 6.25 (d, 2H, *J* = 8.4 Hz), 6.45–6.47 (br m, 6H), 6.64–6.70 (t-like m, 2H), 7.10–7.16 (t-like m, 2H), 7.39–7.41 (br m, 6H), 7.51 (d, 2H, *J* = 8.0 Hz), 7.63 (br m, 4H), 7.72 (d, 2H, *J* = 8.5 Hz), 7.96 (br, m, 4H), 8.28–8.34 (m, 2H). <sup>31</sup>P NMR (121 MHz, CDCl<sub>3</sub>) δ 45.7 (s). HRMS (ESI<sup>+</sup>) *m/z* 982.1918 (M<sup>+</sup>), calcd for C<sub>53</sub>H<sub>52</sub><sup>35</sup>Cl<sub>2</sub>N<sub>2</sub>O<sub>2</sub>P<sub>2</sub><sup>102</sup>Ru: 982.1925. Found: C, 64.62%, H, 5.55%; N, 2.70%. Calcd for C<sub>53</sub>H<sub>52</sub>Cl<sub>2</sub>N<sub>2</sub>O<sub>2</sub>P<sub>2</sub>Ru: C, 64.76%; H, 5.33%; N, 2.85%.

***trans*-RuCl<sub>2</sub>[(*S*)-tolbinap][(*R*)-iphan] [(*S,R*)-3c].** IR (ATR) 3309, 2989, 1500, 1223, 1194, 1053, 1038, 808, 756, 744 cm<sup>-1</sup>. <sup>1</sup>H NMR (400 MHz, CDCl<sub>3</sub>) δ 0.53 (d, 6H, *J* = 6.4 Hz), 1.24 (s, 6H), 1.77 (s, 6H), 2.35 (s, 6H), 2.63–2.73 (m, 4H), 3.01 (br m, 2H), 3.46–3.51 (m, 2H), 6.20–6.24 (m, 6H), 6.65–6.69 (t-like m, 2H), 7.12–7.16 (t-like m, 2H), 7.21 (d, 4H, *J* = 8.0 Hz), 7.46 (br m, 4H), 7.50 (d, 2H, *J* = 7.9 Hz), 7.72 (d, 2H, *J* = 8.7 Hz), 7.87 (br, m, 4H), 8.28–8.33 (m, 2H). <sup>31</sup>P NMR (161 MHz, CDCl<sub>3</sub>) δ 44.5 (s). HRMS (ESI<sup>+</sup>) *m/z* 1038.2580 (M<sup>+</sup>), calcd for C<sub>57</sub>H<sub>60</sub><sup>35</sup>Cl<sub>2</sub>N<sub>2</sub>O<sub>2</sub>P<sub>2</sub><sup>102</sup>Ru: 1038.2551. Found: C, 61.34%, H, 5.34%; N, 2.40%. Calcd for C<sub>57</sub>H<sub>60</sub>Cl<sub>2</sub>N<sub>2</sub>O<sub>2</sub>P<sub>2</sub>Ru•0.67CHCl<sub>3</sub>: C, 61.92%; H, 5.47%; N, 2.50%.

***trans*-RuCl<sub>2</sub>[(*S*)-binap][(*R,R*)-2,5-hexanediamine] [(*S,R*)-3d].** IR (ATR) 3320, 3054, 2960, 1574, 1482, 1432, 1260, 1085, 1027, 806, 738, 696 cm<sup>-1</sup>. <sup>1</sup>H NMR (300 MHz, CDCl<sub>3</sub>) δ 0.44 (d, 6H, *J* = 6.4 Hz), 1.25–1.31 (br m, 2H), 1.52 (br m, 2H), 2.73–2.74 (br m, 4H), 2.99 (br m, 2H), 6.25 (d, 2H, *J* = 8.4 Hz), 6.45–6.47 (br m, 6H), 6.65–6.70 (t-like m, 2H), 7.10–7.15 (t-like m, 2H), 7.38 (br m, 6H), 7.52 (d, 2H, *J* = 7.8 Hz), 7.64 (br m, 4H), 7.72 (d, 2H, *J* = 8.5 Hz), 7.98 (br, m, 4H), 8.26–8.32 (m, 2H). <sup>31</sup>P NMR (121 MHz, CDCl<sub>3</sub>) δ 45.7 (s). HRMS (ESI<sup>+</sup>) *m/z* 910.1706 (M<sup>+</sup>), calcd for C<sub>50</sub>H<sub>48</sub><sup>35</sup>Cl<sub>2</sub>N<sub>2</sub>O<sub>2</sub>P<sub>2</sub><sup>102</sup>Ru: 910.1713. Found: C, 65.93%, H, 5.31%; N, 3.08%. Calcd for C<sub>50</sub>H<sub>48</sub>Cl<sub>2</sub>N<sub>2</sub>O<sub>2</sub>P<sub>2</sub>Ru•0.25CHCl<sub>3</sub>: C, 64.16%; H, 5.17%; N, 2.98%.

***trans*-RuCl<sub>2</sub>[(*R*)-tolbinap][(*S,S*)-2,5-hexanediamine] [(*R,S*)-3e].** IR (ATR) 3316, 3053, 2919, 1499, 1191, 1089, 1037, 804 cm<sup>-1</sup>. <sup>1</sup>H NMR (400 MHz, CDCl<sub>3</sub>) δ 0.43 (d, 6H, *J* = 6.4 Hz), 1.21–1.30 (m, 2H), 1.51 (br m, 2H), 1.78 (s, 6H), 2.33 (s, 6H), 2.71 (br m, 4H), 2.96 (br m, 2H), 6.20–6.24 (m, 6H), 6.63–6.69 (t-like m, 2H), 7.09–7.19 (m, 6H), 7.48–7.52 (m, 6H), 7.72 (d, 2H, *J* = 8.5 Hz), 7.90 (br m, 4H), 8.26–8.32 (m, 2H). <sup>31</sup>P NMR (121 MHz, CDCl<sub>3</sub>) δ 43.9 (s). HRMS (ESI<sup>+</sup>) *m/z* 966.2343 (M<sup>+</sup>), calcd for C<sub>54</sub>H<sub>56</sub><sup>35</sup>Cl<sub>2</sub>N<sub>2</sub>O<sub>2</sub>P<sub>2</sub><sup>102</sup>Ru: 966.2339.

**(B) Asymmetric Hydrogenation of 3-Quinuclidinone (1a) (S/C = 50,000)**

Solid (*S,R*)-**3b** (3.0 mg, 0.0031 mmol) and 3-quinuclidinone (**1a**) (18.78 g, 150 mmol) were placed in a 200 mL SUS autoclave with a Teflon-coated magnetic stirring bar. Air present in the autoclave was replaced by argon. 2-Propanol (49 mL) was added to the autoclave and degassed. A solution of *t*-C<sub>4</sub>H<sub>9</sub>OK in 2-propanol (1 M, 1.0 mL, 1.0 mmol) which had been degassed was added to the autoclave. Hydrogen was initially introduced into the autoclave at a pressure of 5 atm, before being reduced to 1 atm by carefully releasing the stop valve. After this procedure was repeated 5 times, the vessel was pressurized to 50 atm. The reaction mixture was vigorously stirred at 25 °C. After stirring for 24 h and carefully venting the hydrogen gas, the solvent was removed under reduced pressure. The residue was purified by silica-gel (Fuji silysia, Chromatorex NH) column chromatography giving (*R*)-3-quinuclidinol<sup>2,3</sup> [(*R*)-**2a**] (colorless powder, 18.9 g, 99% yield, 97% ee). The enantiomeric excess of **2a** was determined by HPLC analysis of acetylated derivative. Column, CHIRALCEL AD-H; eluent, hexane:ethanol:2-propanol = 90:5:5; flow, 0.5 mL min<sup>-1</sup>; column temp, 25 °C; retention time (*t*<sub>R</sub>) of Ac-(*S*)-**2a**, 18.3 min (1.5%); *t*<sub>R</sub> of Ac-(*R*)-**2a**, 24.6 min (98.5%). [ $\alpha$ ]<sub>D</sub><sup>28</sup> -42.5 (*c* 1.06, 1M HCl) (lit.<sup>2</sup> [ $\alpha$ ]<sub>D</sub><sup>25</sup> -44.9 (*c* 2.0, 1 M HCl), 96% ee (*R*)). IR (KBr-disk) 3109 (br), 2941, 2871, 1456, 1346, 1309, 1116, 1045, 988, 817, 795, 773 cm<sup>-1</sup>. <sup>1</sup>H NMR (400 MHz, CDCl<sub>3</sub>)  $\delta$  1.31–1.40 (m, 1H), 1.41–1.51 (m, 1H), 1.64–1.72 (m, 1H), 1.79–1.83 (m, 1H), 1.90–1.98 (m, 1H), 2.58–2.69 (m, 2H), 2.72–2.82 (m, 2H), 2.87–2.95 (m including a broad signal, 2H), 3.13 (ddd, *J*=14.1, 8.2, 2.3 Hz, 1H), 3.83–3.87 (m, 1H). <sup>13</sup>C NMR (100 MHz, CDCl<sub>3</sub>)  $\delta$  18.9 (CH<sub>2</sub>), 24.8 (CH<sub>2</sub>), 28.3 (CH), 46.3 (CH<sub>2</sub>), 47.3 (CH<sub>2</sub>), 57.9 (CH<sub>2</sub>), 67.5 (CH). HRMS(EI<sup>+</sup>), *m/z* 127.0997 (M<sup>+</sup>), calcd C<sub>7</sub>H<sub>13</sub>NO: 127.0997. Found: C, 65.81%, H, 10.32%; N, 10.94%. Calcd for C<sub>7</sub>H<sub>13</sub>NO: C, 66.10%; H, 10.30%; N, 11.01%.

**(C) Asymmetric Hydrogenation of Bicyclo[2.2.2]octan-2-one (1b) (S/C = 1,000)**

Solid (*S,R*)-**3b** (1.3 mg, 1.3  $\mu$ mol), *t*-C<sub>4</sub>H<sub>9</sub>OK (14.9 mg, 0.133 mmol), and bicyclo[2.2.2]octan-2-one (**1b**) (167.9 mg, 1.35 mmol) were placed in a 100-mL glass

autoclave with a Teflon-coated magnetic stirring bar under Ar. A degassed (three freeze–thaw cycles) mixture of 2-propanol (4.8 mL) and *tert*-butylalcohol (1.6 mL) was added to the autoclave. Hydrogen was initially introduced into the autoclave at a pressure of 10 atm, before being reduced to 1 atm by carefully releasing the stop valve. After this procedure was repeated several times, the vessel was pressurized to 20 atm, and then the reaction mixture was vigorously stirred at 20 °C for 2 h. After venting the hydrogen gas, the solvent was carefully removed under reduced pressure. The residue was purified by silica-gel column chromatography eluted with a hexane–ethyl acetate (7:1 then 4:1) giving (*S*)-bicyclo[2.2.2]octan-2-ol<sup>4</sup> [(*S*)-**2b**] (colorless crystals, 153.4 mg, 90% yield, 98% ee). The enantiomeric excess of **2b** was determined by GC analysis. Column, BETA DEX-120 (0.25x30, DF = 0.25); carrier, He (100 kPa); oven temp, 80 °C, 2 min hold, 1 °C/min to 140 °C; *t<sub>R</sub>* of (*R*)-**2b**, 47.98 min (1%); *t<sub>R</sub>* of (*S*)-**2b**, 48.34 min (99%).  $[\alpha]_D^{28} +33.0$  (*c* 1.01, CHCl<sub>3</sub>). (lit.<sup>4</sup>  $[\alpha]_D^{27} +31.3$  (*c* 1.4, CHCl<sub>3</sub>), 97.8% ee (*S*)). IR (KBr-disk) 3357, 2932, 2861, 1456, 1362, 1092, 1034 cm<sup>-1</sup>. <sup>1</sup>H NMR (400 MHz, CDCl<sub>3</sub>) δ 1.30–1.51 (m, 6H), 1.53–1.65 (m, 4H), 1.84–1.92 (m, 1H), 1.97–2.05 (m, 1H), 3.95 (br d, 1H, *J*=9.0 Hz). <sup>13</sup>C NMR (100 MHz, CDCl<sub>3</sub>) δ 18.5 (CH<sub>2</sub>), 23.7 (CH<sub>2</sub>), 24.4 (CH<sub>2</sub>), 24.7 (CH), 25.6 (CH<sub>2</sub>), 31.7 (CH), 37.5 (CH<sub>2</sub>), 69.6 (CH). HRMS(EI<sup>+</sup>), *m/z* 126.1045 (M<sup>+</sup>), calcd for C<sub>8</sub>H<sub>14</sub>O: 126.1045. Found: C, 76.14%, H, 11.37%. Calcd for C<sub>8</sub>H<sub>14</sub>O: C, 76.14%; H, 11.18%.

#### (D) Asymmetric Hydrogenation of (±)-Benzobicyclo[2.2.2]octen-2-one [(±)-**4**]

Solid (*S,R*)-**3b** (1.3 mg, 1.3 μmol), *t*-C<sub>4</sub>H<sub>9</sub>OK (16.6 mg, 0.148 mmol), and (±)-**4**<sup>5</sup> (224.0 mg, 1.30 mmol) were placed in a 100-mL glass autoclave with a Teflon-coated magnetic stirring bar under Ar. A degassed (three freeze–thaw cycles) mixture of 2-propanol (4.9 mL) and *tert*-butylalcohol (1.5 mL) was added to the autoclave. Hydrogen was initially introduced into the autoclave at a pressure of 10 atm, before being reduced to 1 atm by carefully releasing the stop valve. After this procedure was repeated several times, the vessel was pressurized to 20 atm, and then the reaction mixture was vigorously stirred at 20 °C for 2 h. After venting the hydrogen gas, the

solvent was carefully removed under reduced pressure. The residue was purified on silica-gel preparative thin-layer chromatography developed with a toluene–ethyl acetate (10:1) giving (1*R*,2*S*,4*R*)-benzobicyclo[2.2.2]octen-2-ol<sup>4,5</sup> (**5**, *exo*-alcohol) (colorless crystals, 94.2 mg, 42% yield, 99% ee), and (1*S*,2*S*,4*S*)-benzobicyclo[2.2.2]octen-2-ol<sup>4,5</sup> (**6**, *endo*-alcohol) (colorless crystals, 103.5 mg, 46% yield, 96% ee). The enantiomeric excess of **5** and **6** was determined by HPLC analysis. For **5**: Column, CHIRALCEL OD-H; eluent, hexane:2-propanol = 95:5; flow, 0.5 mL min<sup>-1</sup>; column temp, 40 °C; retention time (*t<sub>R</sub>*) of (1*S*,2*R*,4*S*)-**5**, 13.7 min (0.3%); *t<sub>R</sub>* of (1*R*,2*S*,4*R*)-**5**, 16.0 min (99.7%). For **6**: Column, CHIRALCEL OJ-H; eluent, hexane:2-propanol = 90:10; flow, 0.5 mL min<sup>-1</sup>; column temp, 40 °C; retention time (*t<sub>R</sub>*) of (1*S*,2*S*,4*S*)-**6**, 23.8 min (97.9%); *t<sub>R</sub>* of (1*R*,2*R*,4*R*)-**6**, 31.5 min (2.1%). *exo*-alcohol (1*R*,2*S*,4*R*)-**5**: [ $\alpha$ ]<sub>D</sub><sup>28</sup> +7.3 (*c* 1.03, CHCl<sub>3</sub>), lit.<sup>4</sup> [ $\alpha$ ]<sub>D</sub> +7.7 (CHCl<sub>3</sub>, (*S*)-config., extrapolated). IR (KBr-disk) 3319 (br), 2945, 1482, 1460, 1077, 1051, 1012, 750 cm<sup>-1</sup>. <sup>1</sup>H NMR (400 MHz, CDCl<sub>3</sub>)  $\delta$  1.23–1.31 (m, 1H), 1.37–1.48 (m, 2H), 1.61 (br d, 1H), 1.86–1.94 (m, 1H), 1.95–2.03 (m, 1H), 2.26–2.34 (m, 1H), 2.96–2.99 (m, 1H), 3.01–3.03 (m, 1H), 3.91–3.94 (m, 1H), 7.11–7.14 (m, 1H), 7.17–7.21 (m, 3H). <sup>13</sup>C NMR (100 MHz, CDCl<sub>3</sub>)  $\delta$  18.0 (CH<sub>2</sub>), 26.4 (CH<sub>2</sub>), 34.6 (CH), 36.8 (CH<sub>2</sub>), 42.2 (CH), 69.5 (CH), 123.5 (CH), 124.7 (CH), 126.0 (CH), 126.4 (CH), 141.4 (C), 143.8 (C). *endo*-alcohol (1*S*,2*S*,4*S*)-**6**: [ $\alpha$ ]<sub>D</sub><sup>28</sup> –20.0 (*c* 1.04, CHCl<sub>3</sub>), lit.<sup>4</sup> [ $\alpha$ ]<sub>D</sub><sup>27</sup> –18.55 (*c* 0.9, CHCl<sub>3</sub>), 85% ee (*S*). IR (KBr, disk) 3281 (br), 3211 (br), 2941, 2864, 1485, 1330, 1080, 1035, 754 cm<sup>-1</sup>. <sup>1</sup>H NMR (400 MHz, CDCl<sub>3</sub>)  $\delta$  1.02 (d, *J*=8.6 Hz, 1H), 1.19 (m, 1H), 1.26–1.34 (m, 1H), 1.42–1.50 (m, 1H), 1.57–1.72 (m, 2H), 2.26 (ddd, *J*=14.0, 8.8, 2.5 Hz, 1H), 3.03–3.06 (m, 1H), 3.09–3.11 (m, 1H), 4.09–4.14 (m, 1H), 7.15–7.18 (m, 1H), 7.21–7.24 (m, 3H). <sup>13</sup>C NMR (100 MHz, CDCl<sub>3</sub>)  $\delta$  22.5 (CH<sub>2</sub>), 24.6 (CH<sub>2</sub>), 34.1 (CH), 39.5 (CH<sub>2</sub>), 42.0 (CH<sub>2</sub>), 69.7 (CH), 123.5 (CH), 126.2 (CH), 126.65 (CH), 126.72 (CH), 138.4 (C), 144.0 (C).

**(E) Asymmetric Hydrogenation of (±)-Norcamphor [(±)-7] (S/C = 1,000)**

Solid (*S,R*)-**3b** (1.4 mg, 1.4 μmol), *t*-C<sub>4</sub>H<sub>9</sub>OK (16.0 mg, 0.143 mmol), and (±)-norcamphor [(±)-**7**] (158.0 mg, 1.43 mmol) were placed in a 100-mL glass autoclave with a Teflon-coated magnetic stirring bar under Ar. A degassed (three freeze–thaw cycles) mixture of 2-propanol (4.8 mL) and *tert*-butylalcohol (1.6 mL) was added to the autoclave. Hydrogen was initially introduced into the autoclave at a pressure of 10 atm, before being reduced to 1 atm by carefully releasing the stop valve. After this procedure was repeated several times, the vessel was pressurized to 10 atm, and then the reaction mixture was vigorously stirred at 20 °C for 2 h. After venting the hydrogen gas, the solvent was carefully removed under reduced pressure. The residue was purified by silica-gel thin layer chromatography developed with a 7:1 hexane–ethyl acetate to give a diastereomeric mixture of norborneol [**8** (*exo*) and **9** (*endo*), **8**:**9** = 11:89] (colorless crystals, 115.1 mg, 72% yield). This sample contained a small amount of ethyl acetate (4%(w/w)). The ratio of diastereomers was determined by GC analysis. Column, BETA DEX-325 (0.25x30, DF = 0.25); carrier, He (100 kPa); oven temp, 100 °C isothermal, *t<sub>R</sub>* of (1*R*,2*R*,4*S*)-**8**, 17.14 min (0.28%); *t<sub>R</sub>* of (1*S*,2*S*,4*R*)-**8**, 17.59 min (11.3%), *t<sub>R</sub>* of (1*S*,2*R*,4*R*)-**9**, 18.19 min (38.5%); *t<sub>R</sub>* of (1*R*,2*S*,4*S*)-**9**, 18.65 min (49.9%). <sup>1</sup>H NMR (400 MHz, CDCl<sub>3</sub>) δ 0.84 (dt, *endo*-1H, *J<sub>d</sub>*=12.7, *J<sub>t</sub>*=3.4 Hz), 0.98–1.05 (m, *exo*-2H), 1.10–1.14 (m, *exo*-1H), 1.26–1.70 (m, *endo*-6H and *exo*-6H), 1.84–1.99 (m, *endo*-2H), 2.14–2.26 (m, *endo*-2H and *exo*-2H), 3.76 (br d, *exo*-1H, *J*=6.8 Hz), 4.23 (br m, *endo*-1H). <sup>13</sup>C NMR (100 MHz, CDCl<sub>3</sub>) δ 19.8 (*endo*, CH<sub>2</sub>), 24.3 (*exo*, CH<sub>2</sub>), 28.0 (*exo*, CH<sub>2</sub>), 29.8 (*endo*, CH<sub>2</sub>), 34.3 (*exo*, CH<sub>2</sub>), 35.3 (*exo*, CH), 37.1 (*endo*, CH), 37.5 (*endo*, CH<sub>2</sub>), 39.3 (*endo*, CH<sub>2</sub>), 42.1 (*exo*, CH<sub>2</sub>), 42.4 (*endo*, CH), 44.1 (*exo*, CH), 72.8 (*endo*, CH), 74.7 (*exo*, CH).

**(F) Asymmetric Hydrogenation of (±)-2-Diphenylmethyl-3-quinuclidinone [(±)-10]**

Solid (*S,R*)-**3b** (2.6 mg, 0.0027 mmol) and (±)-2-diphenylmethyl-3-quinuclidinone<sup>6,7</sup> [(±)-**10**] (7.71 g, 26.5 mmol) were placed in a 200 mL SUS autoclave with a Teflon-



coated magnetic stirring bar. Air present in the autoclave was replaced by argon. 2-Propanol (108 mL) and dimethylacetamide (18 mL) were added to the autoclave. Argon was introduced into the autoclave at a pressure of 5 atm, then released to 1 atm. This procedure was repeated 5 times. A solution of *t*-C<sub>4</sub>H<sub>9</sub>OK in 2-propanol (1 M, 2.6 mL, 2.6 mmol) which had been degassed was added to the autoclave. Hydrogen was initially introduced into the autoclave at a pressure of 5 atm, before being reduced to 1 atm by carefully releasing the stop valve. After this procedure was repeated 5 times, the vessel was pressurized to 50 atm. The reaction mixture was vigorously stirred at 25 °C. After stirring for 24 h and carefully venting the hydrogen gas, the solvent was removed under reduced pressure. The residue was purified by silica-gel (Fuji silysia, Chromatorex NH) column chromatography giving (2*S*,3*S*)-2-diphenylmethyl-3-quinuclidinol<sup>8</sup> [(*S,S*)-**11**] (colorless powder, 7.73 g, 99% yield, >99% ee) as a single diastereomer. The enantiomeric excess of **11** was determined by HPLC analysis. Column, CHIRALCEL OD-RH; eluent, CH<sub>3</sub>CN : 0.1 M aq. KPF<sub>6</sub> = 70 : 30; flow, 0.5 mL min<sup>-1</sup>; column temp, 25 °C; retention time (*t*<sub>R</sub>) of (*R,R*)-**11**, 33.7 min (*t*<sub>R</sub> of racemic **11**) (<0.5% not detected); *t*<sub>R</sub> of (*S,S*)-**11**, 41.1 min (>99.5%). [ $\alpha$ ]<sub>D</sub><sup>26</sup> +11.6 (c 1.0, CHCl<sub>3</sub>) (lit.<sup>8</sup> [ $\alpha$ ]<sub>D</sub> +11.6 (c 1, CDCl<sub>3</sub>), 99.5% ee (*S,S*)). IR (KBr-disk) 3430 (br), 3024, 2935, 2869, 1597, 1495, 1450, 1066, 1042, 755, 741, 702 cm<sup>-1</sup>. <sup>1</sup>H NMR (300 MHz, CDCl<sub>3</sub>)  $\delta$  1.12–1.32 (m, 1H), 1.35 (d, 1H, *J* = 3.3 Hz), 1.47–1.69 (m, 2H), 1.88–1.96 (m, 2H), 1.61–1.69 (m, 1H), 2.77–2.83 (m, 2H), 3.14–3.25 (m, 1H), 3.61–3.67 (m, 1H), 3.94–3.99 (m, 1H), 4.48 (d, 1H, *J* = 12.0 Hz), 7.07–7.34 (m, 8H), 7.42–7.46 (m, 2H). <sup>13</sup>C NMR (75 MHz, CDCl<sub>3</sub>)  $\delta$  19.2 (CH<sub>2</sub>), 24.8 (CH<sub>2</sub>), 28.4 (CH), 41.5 (CH<sub>2</sub>), 49.0 (CH<sub>2</sub>), 49.2 (CH), 63.3 (CH), 68.9 (CH), 126.1 (CH), 126.7 (CH), 127.6 (CH), 127.7 (CH), 128.4 (CH), 129.3 (CH), 143.6 (C), 144.3 (C). HRMS (EI<sup>+</sup>) *m/z* 293.1778 (M<sup>+</sup>), calcd for C<sub>20</sub>H<sub>23</sub>NO: 293.1780. Found: C, 81.36%, H, 8.01%; N, 4.67%. Calcd for C<sub>20</sub>H<sub>23</sub>NO: C, 81.87%; H, 7.90%; N, 4.77%.

### (G) Comment on the Catalytic Cycle

A plausible catalytic cycle for the hydrogenation of ketones with BINAP/1,4-diamine–Ru complexes **3** in 2-propanol is shown in Scheme S1 by analogy with the mechanism of BINAP/DPEN–Ru catalyzed hydrogenation.<sup>9</sup> The excellent activity of this catalyst is rationalized by a non-classical "*metal-ligand cooperative mechanism*" using the NH functionality. The precatalyst dichloride complex **A** is converted to the cationic species **B** by releasing two HCl molecules with the assistance of a base, followed by hydride donation from 2-propanol or H<sub>2</sub>. Then, **B** reacts with an H<sub>2</sub> molecule to form a cationic intermediate **C**, which undergoes deprotonation with a solvent molecule to afford the active RuH<sub>2</sub> species **D**. This process is promoted by a base. Ketone is promptly reduced by **D**, resulting in the alcoholic product and the 16-electron Ru–amide complex **E**. This species is easily protonated in an alcoholic solvent to regenerate the cationic amino complex **B**, while it partially returns to **D** by reaction with H<sub>2</sub>. The active species **D** has a *fac*-structure for the hydride and two nitrogen atoms of the diamine, so that this species and a ketonic substrate react smoothly through the six-membered pericyclic transition state **F**. Ketone is hydrogenated in the outer coordination sphere of **D**, where neither ketone/Ru nor alkoxy/Ru interaction is involved.

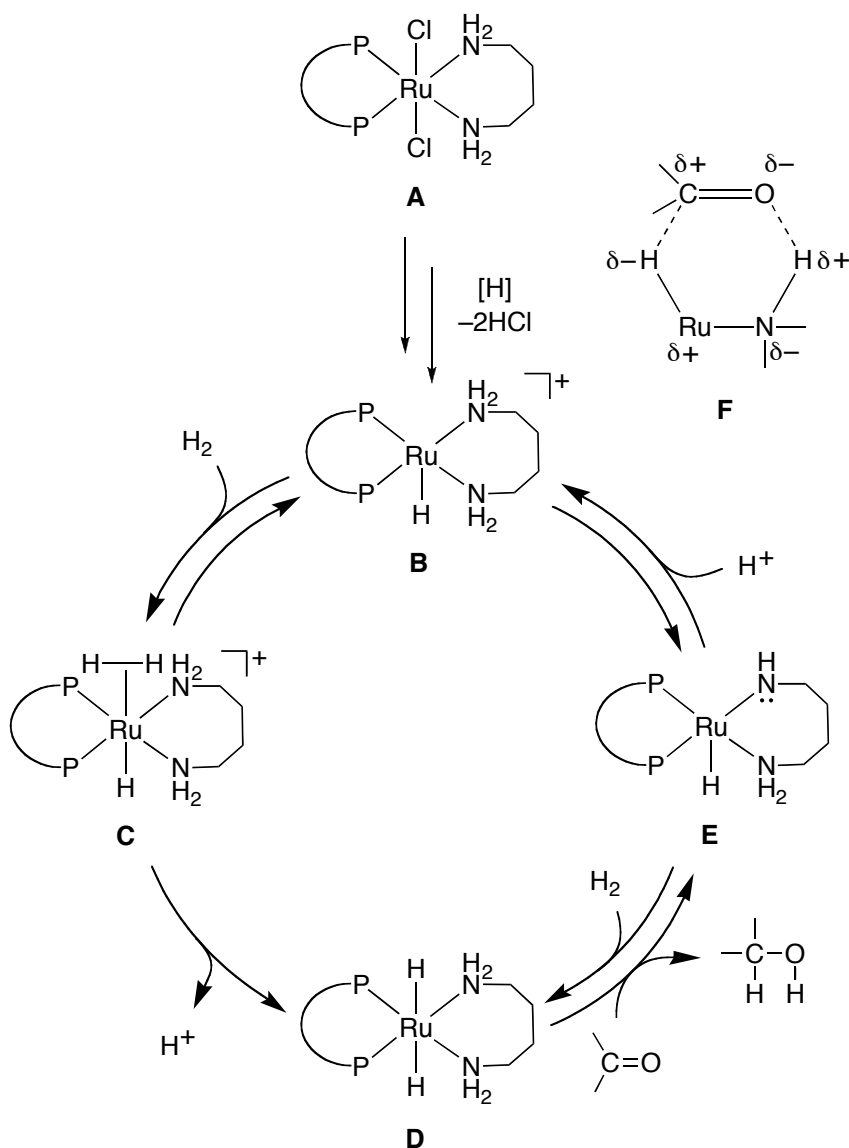

**SCHEME S1.** Plausible Catalytic Cycle for BINAP/1,4-diamine-Ru-catalyzed Hydrogenation of Ketones. P-P = (S)-BINAP.  $NH_2-NH_2$  = 1,4-diamine.

## (H) References

- (1) Ohkuma, T.; Hattori, T.; Ooka, H.; Inoue, T.; Noyori, R. *Org. Lett.* **2004**, *6*, 2681–2683.
- (2) Nomoto, F.; Hirayama, Y.; Ikunaka, M.; Inoue, T.; Otsuka, K. *Tetrahedron: Asymmetry* **2003**, *14*, 1871–1877.

- (3) Knight, D. W.; Lewis, N.; Share, A. C.; Haigh, D. *J. Chem. Soc., Perkin Trans. I* **1998**, 3673–3683.
- (4) Nakazaki, M.; Chikamatsu, H.; Naemura, K.; Asao, M. *J. Org. Chem.* **1980**, *45*, 4432–4440.
- (5) Morrison, H.; Muthuramu, K.; Pandey, G.; Severance, D.; Bigot, B. *J. Org. Chem.* **1986**, *51*, 3358–3363.
- (6) Warawa, E. J.; Mueller, N. J.; Jules, R. *J. Med. Chem.* **1974**, *17*, 497–501.
- (7) Basford, P. A.; Post, R. J.; Smith, J. D.; Taber, G. P. WO2005075473, 2005; *Chem. Abstr.* **2005**, *143*, 230050.
- (8) Swain, C. J.; Seward, E. M.; Cascieri, M. A.; Fong, T. M.; Herbert, R.; MacIntyre, D. E.; Merchant, K. J.; Owen, S. N.; Owens, A. P.; Sabin, V.; Teall, M.; VanNiel, M. B.; Williams, B. J.; Sadowski, S.; Strader, C.; Ball, R. G.; Raymond, B. *J. Med. Chem.* **1995**, *38*, 4793–4805.
- (9) Sandoval, C. A.; Ohkuma, T.; Muñiz, K.; Noyori, R. *J. Am. Chem. Soc.* **2003**, *125*, 13490–13503.

**(I) Spectral Charts**



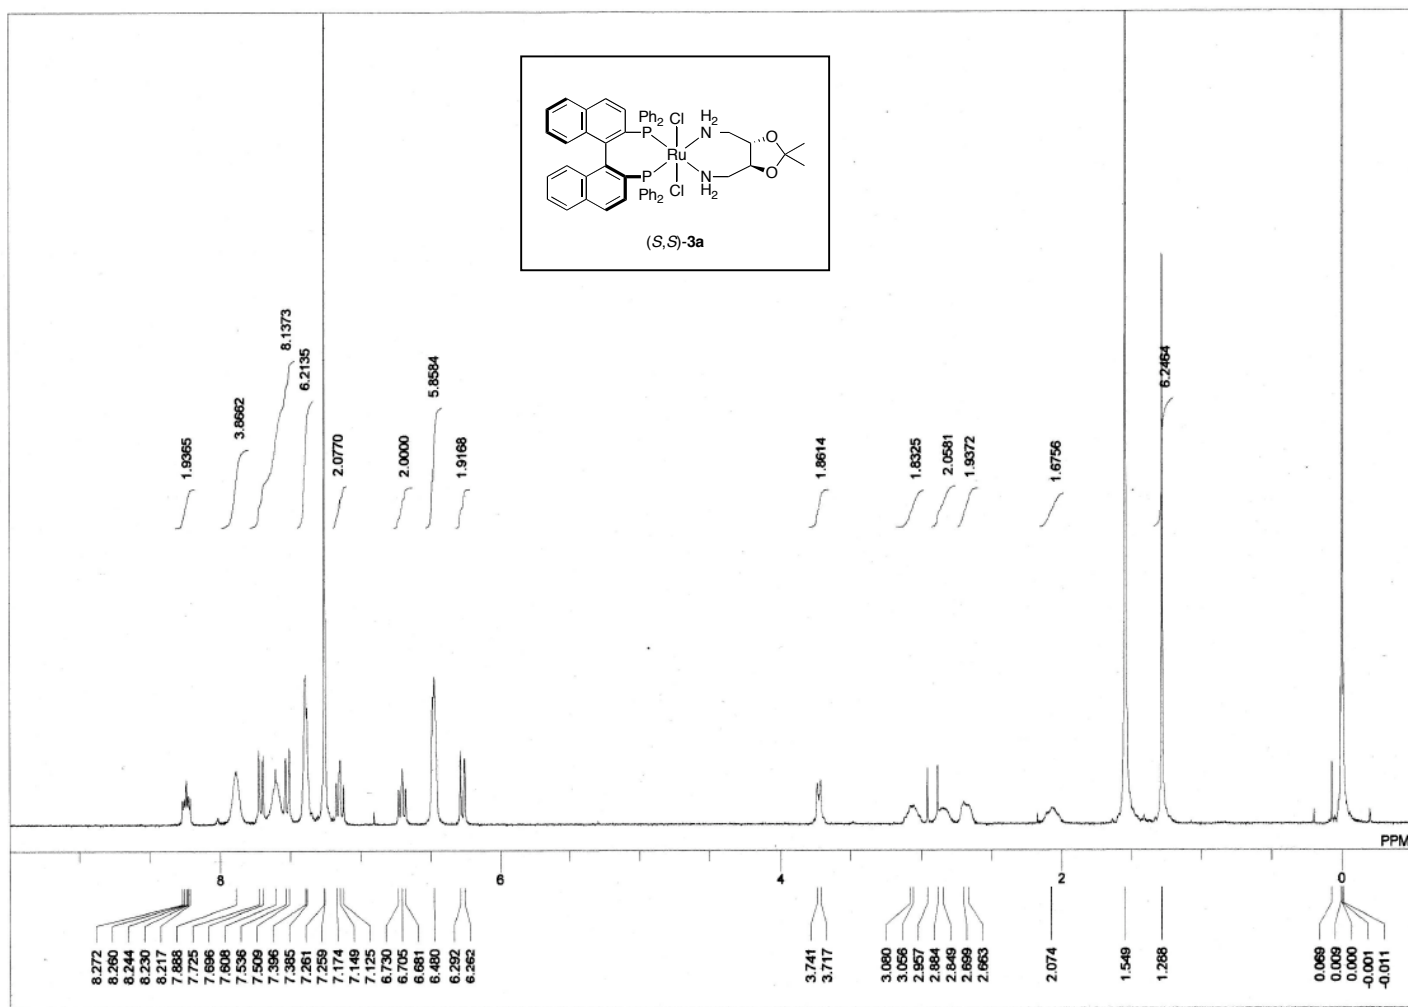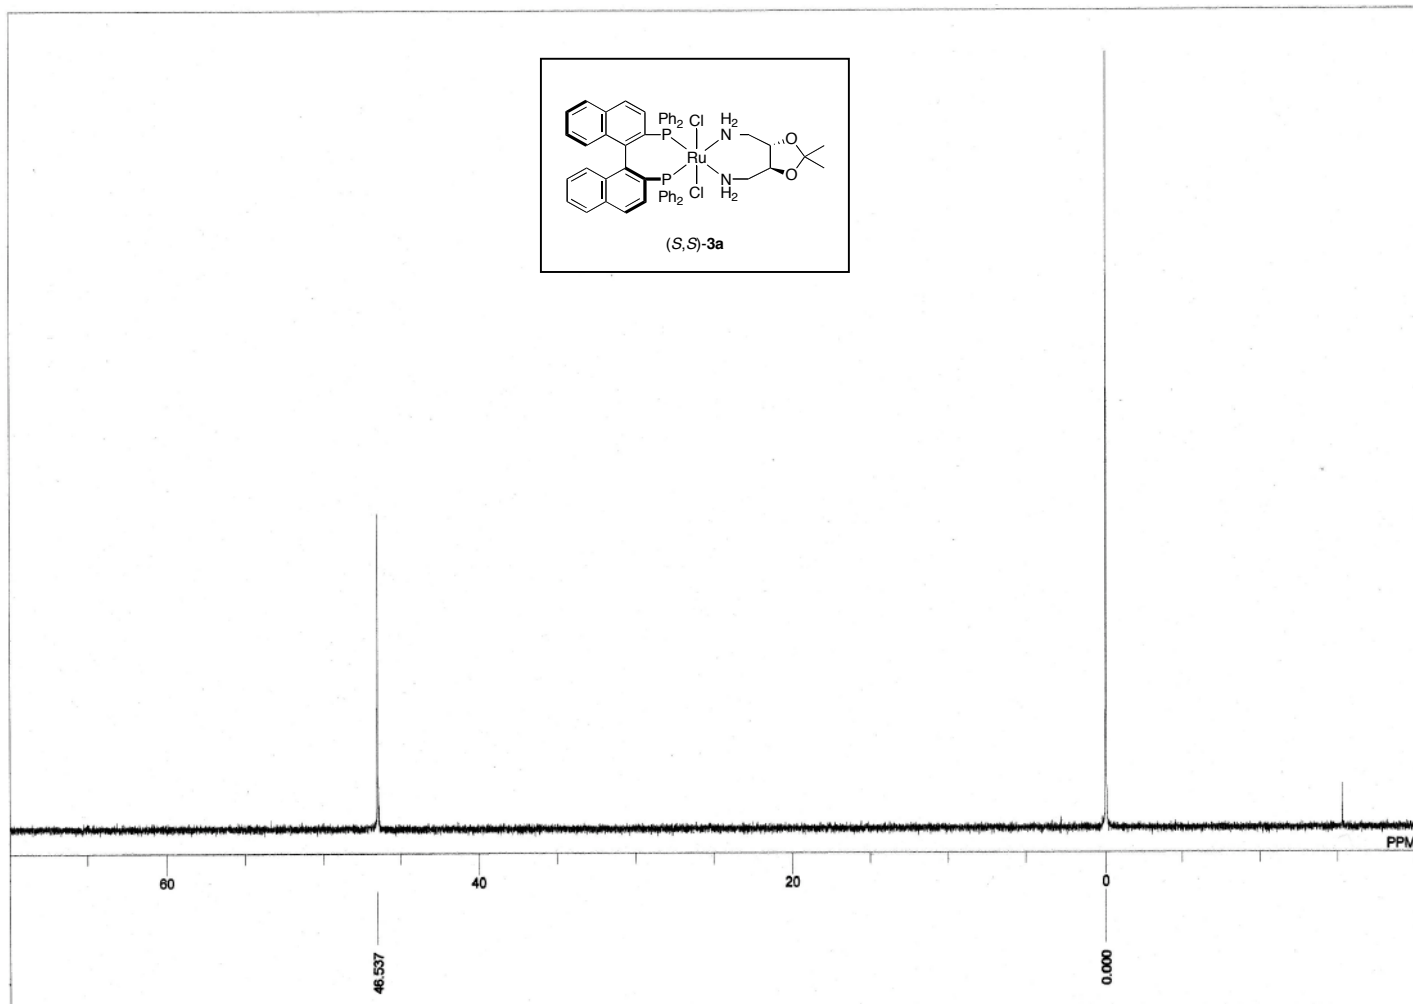

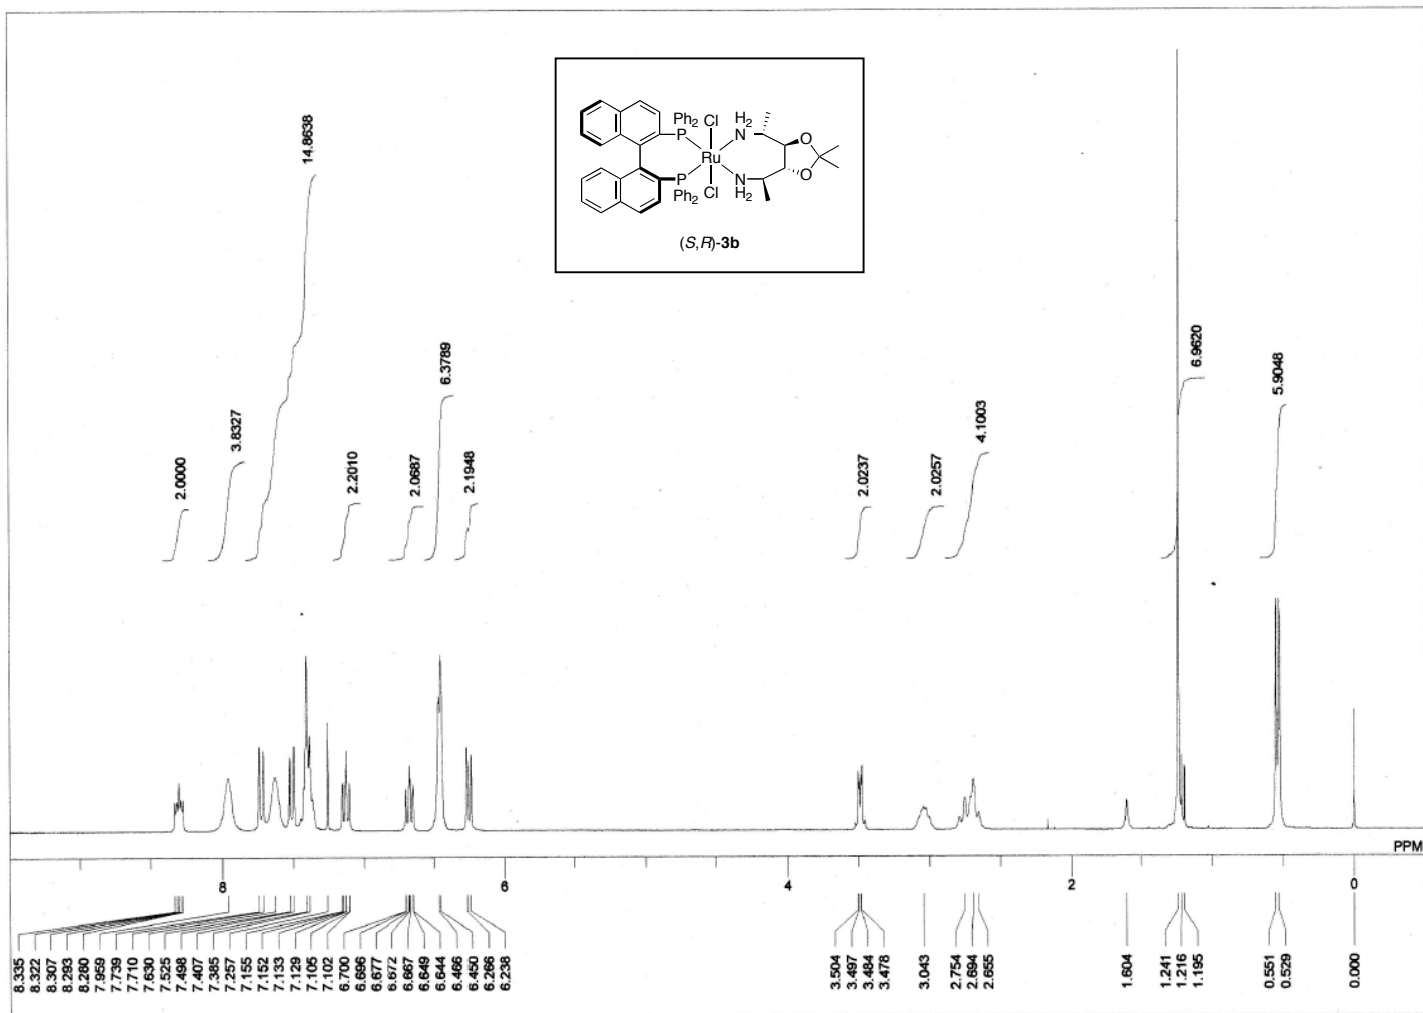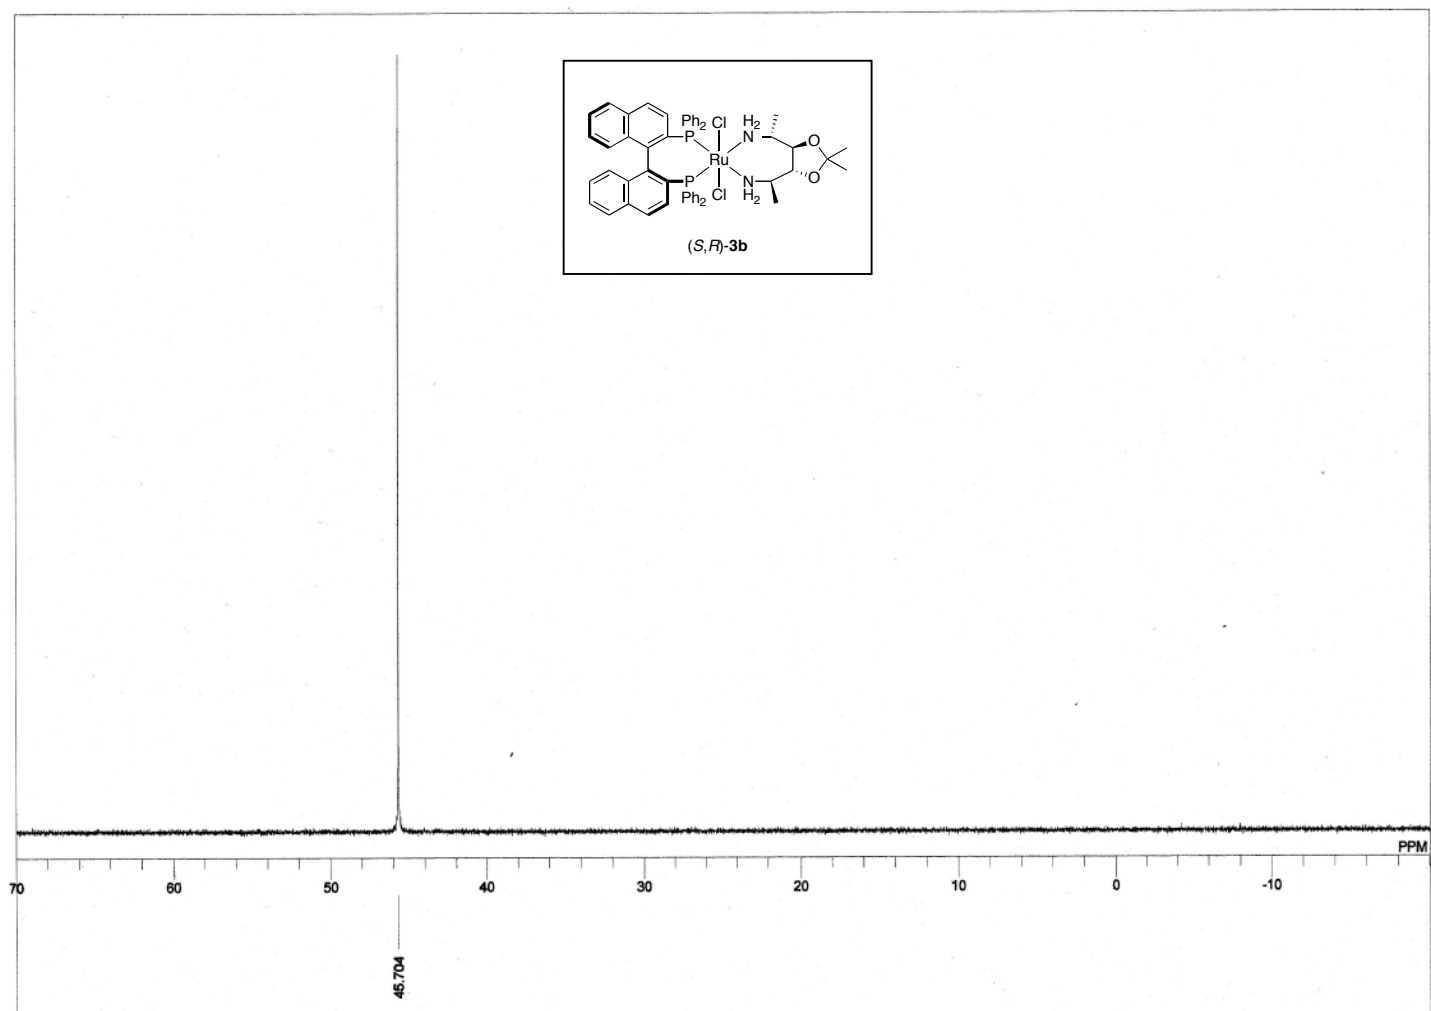

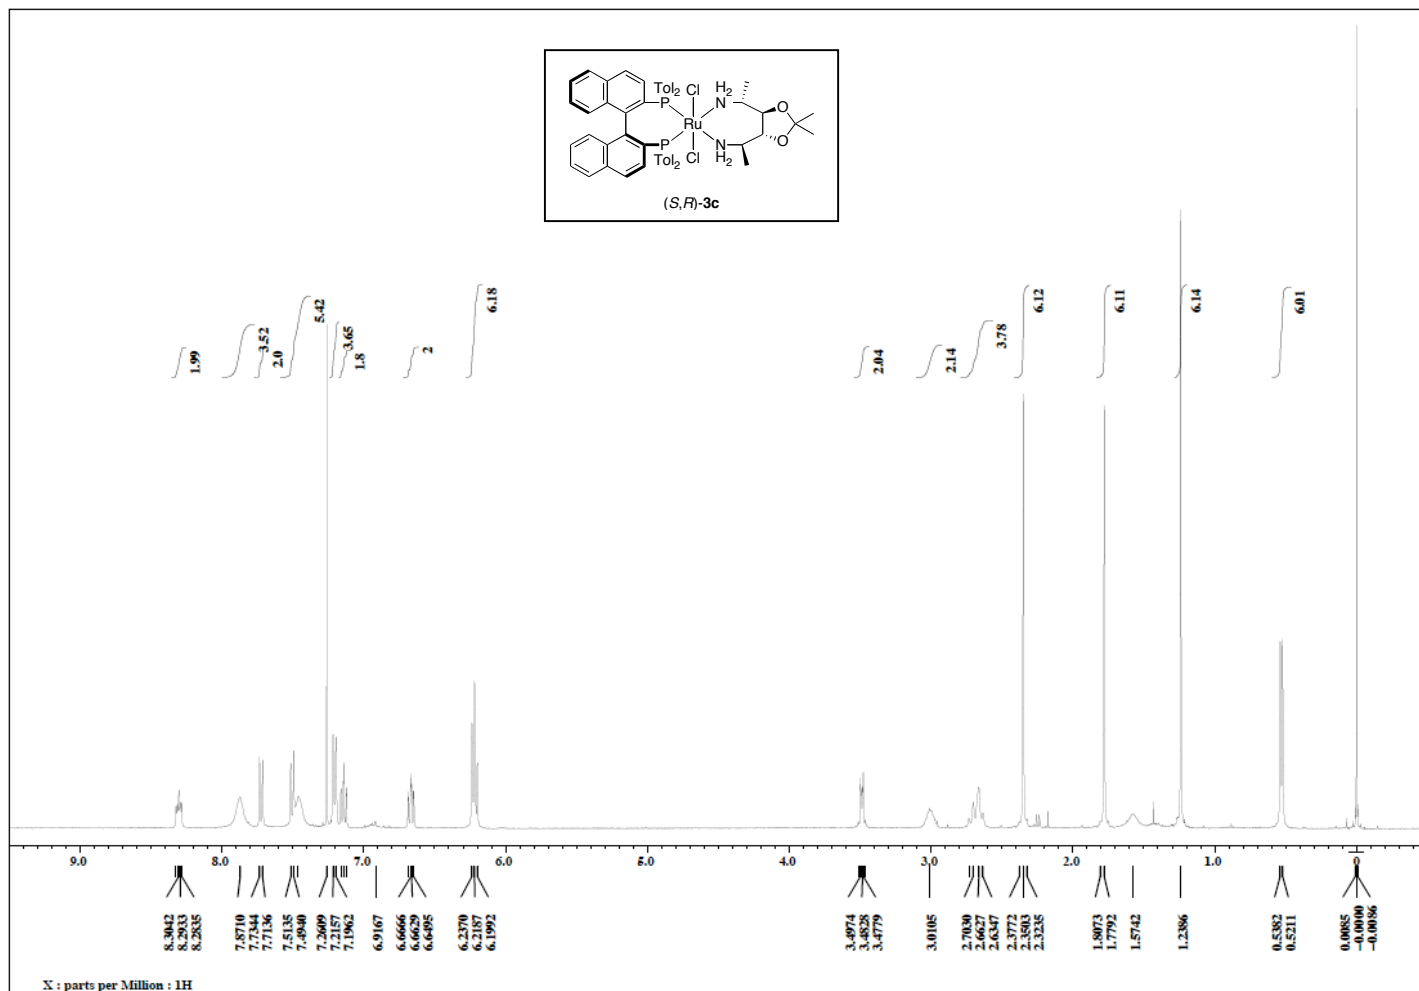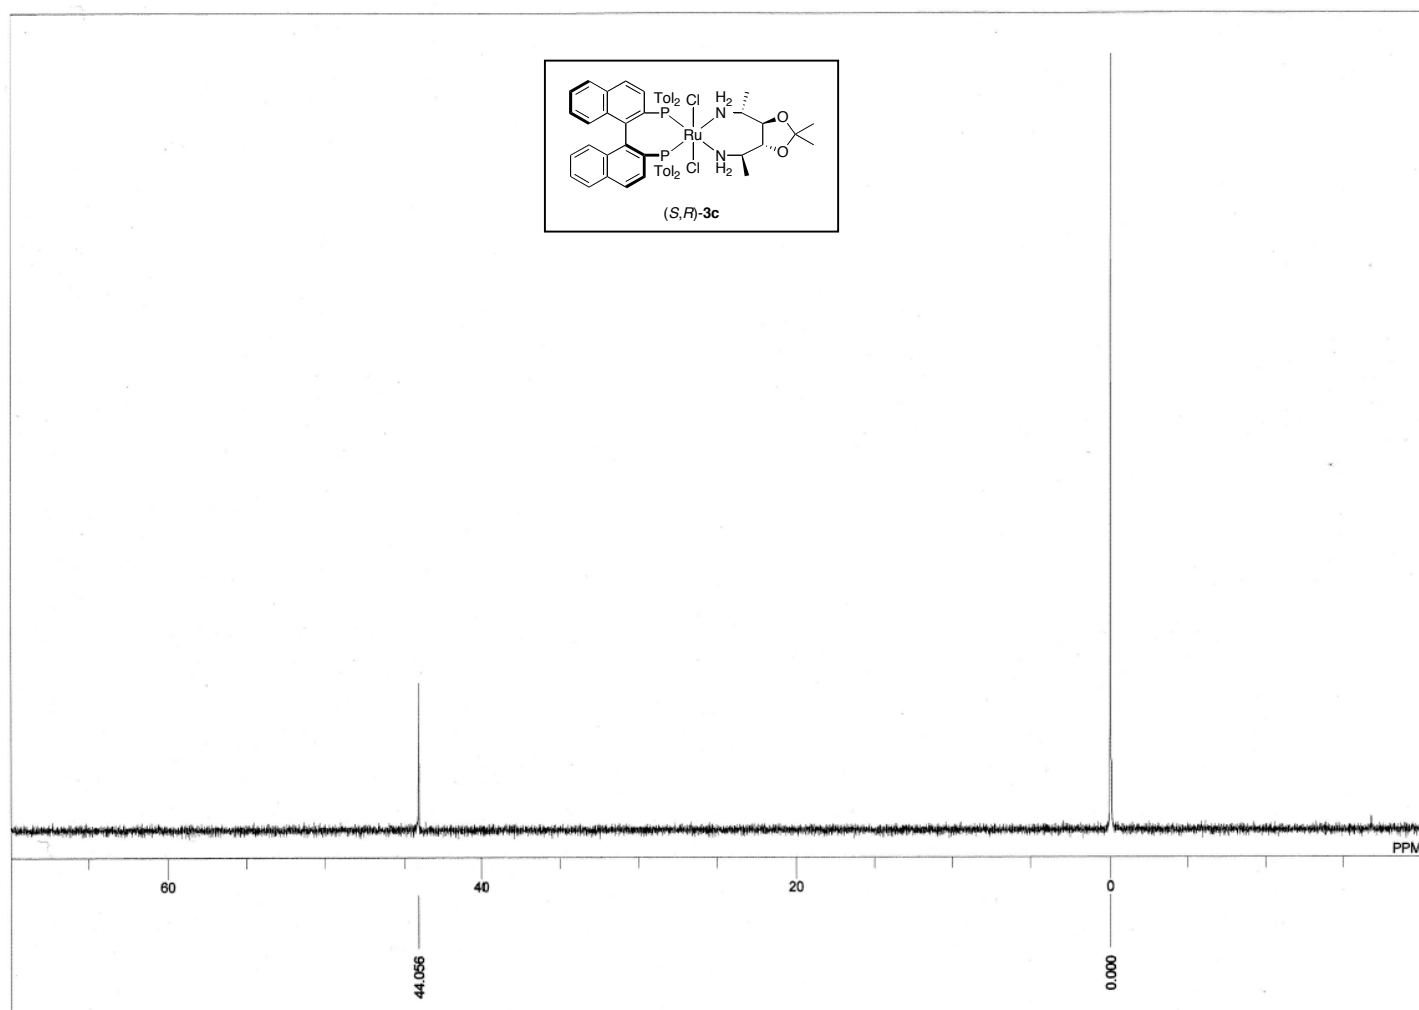



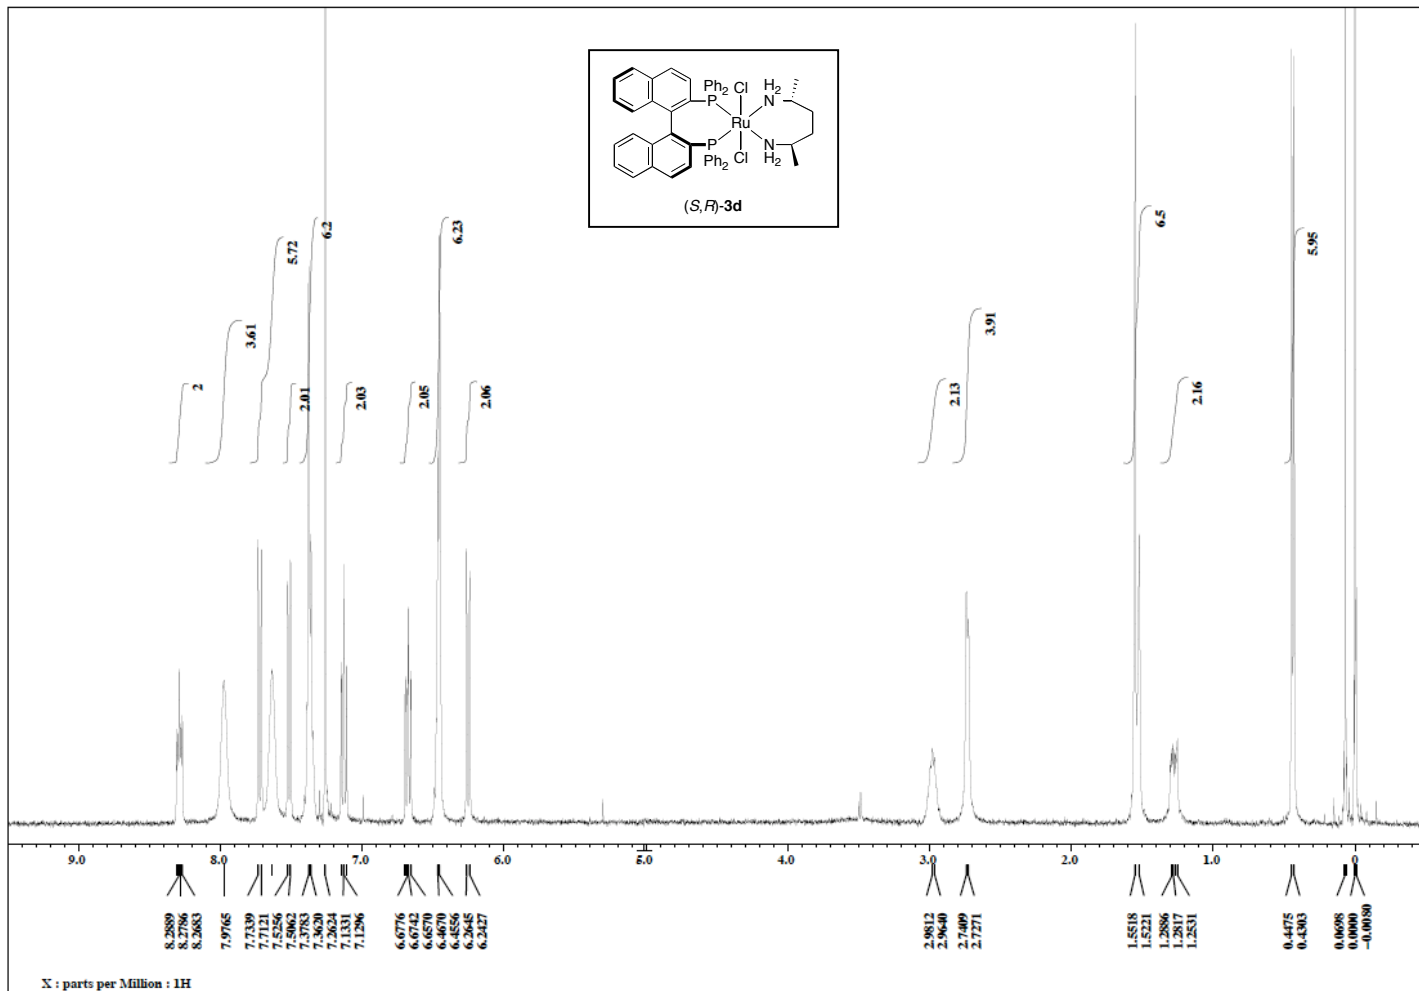

C:\WINNMR98\COMMON\\_DEFAULT.ALS  
BINAP/HDN

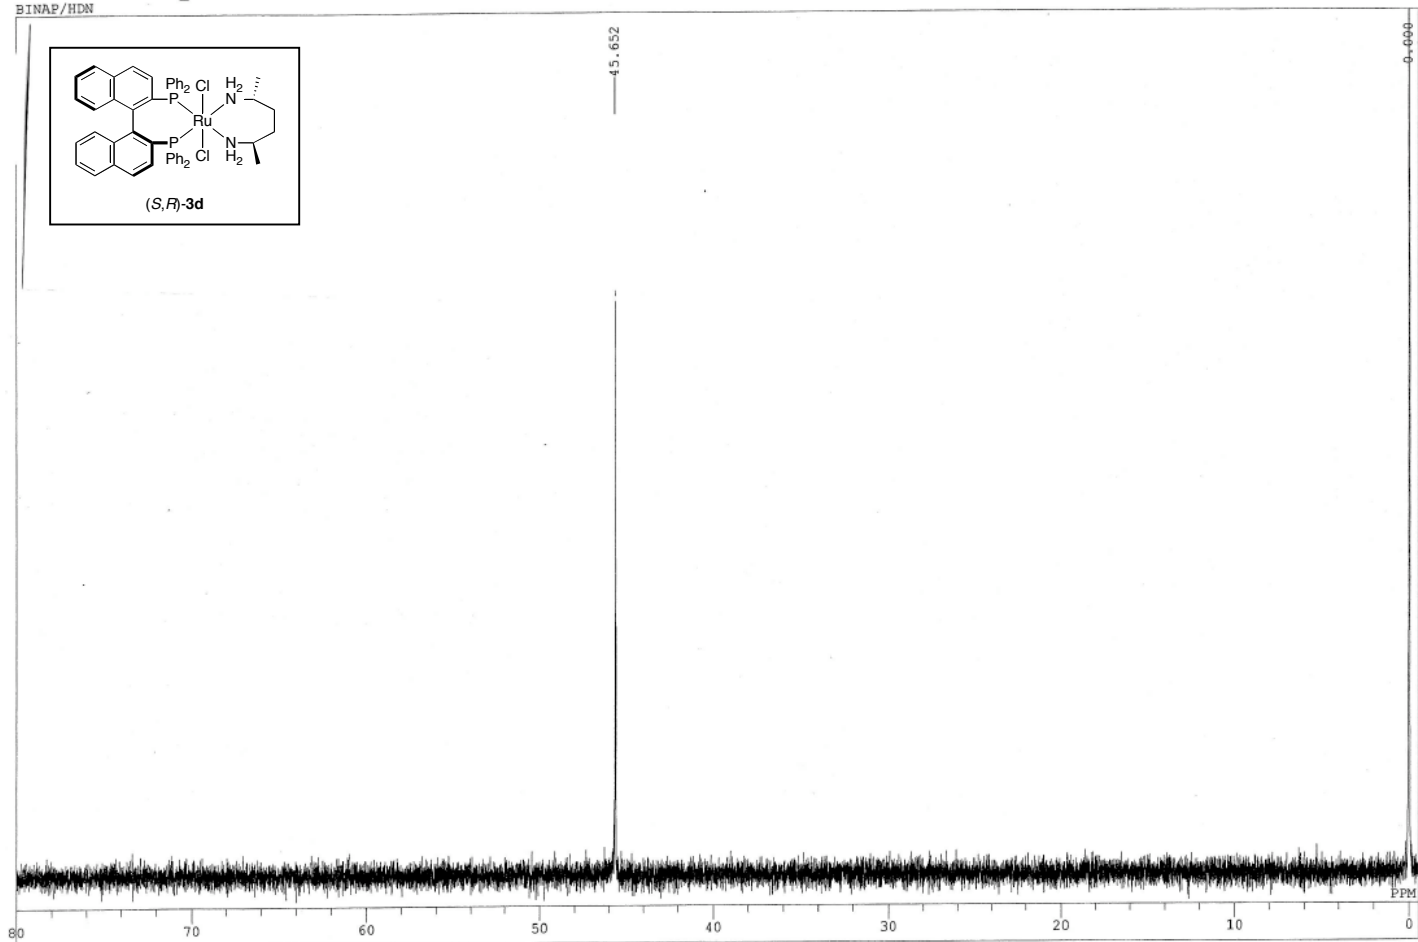

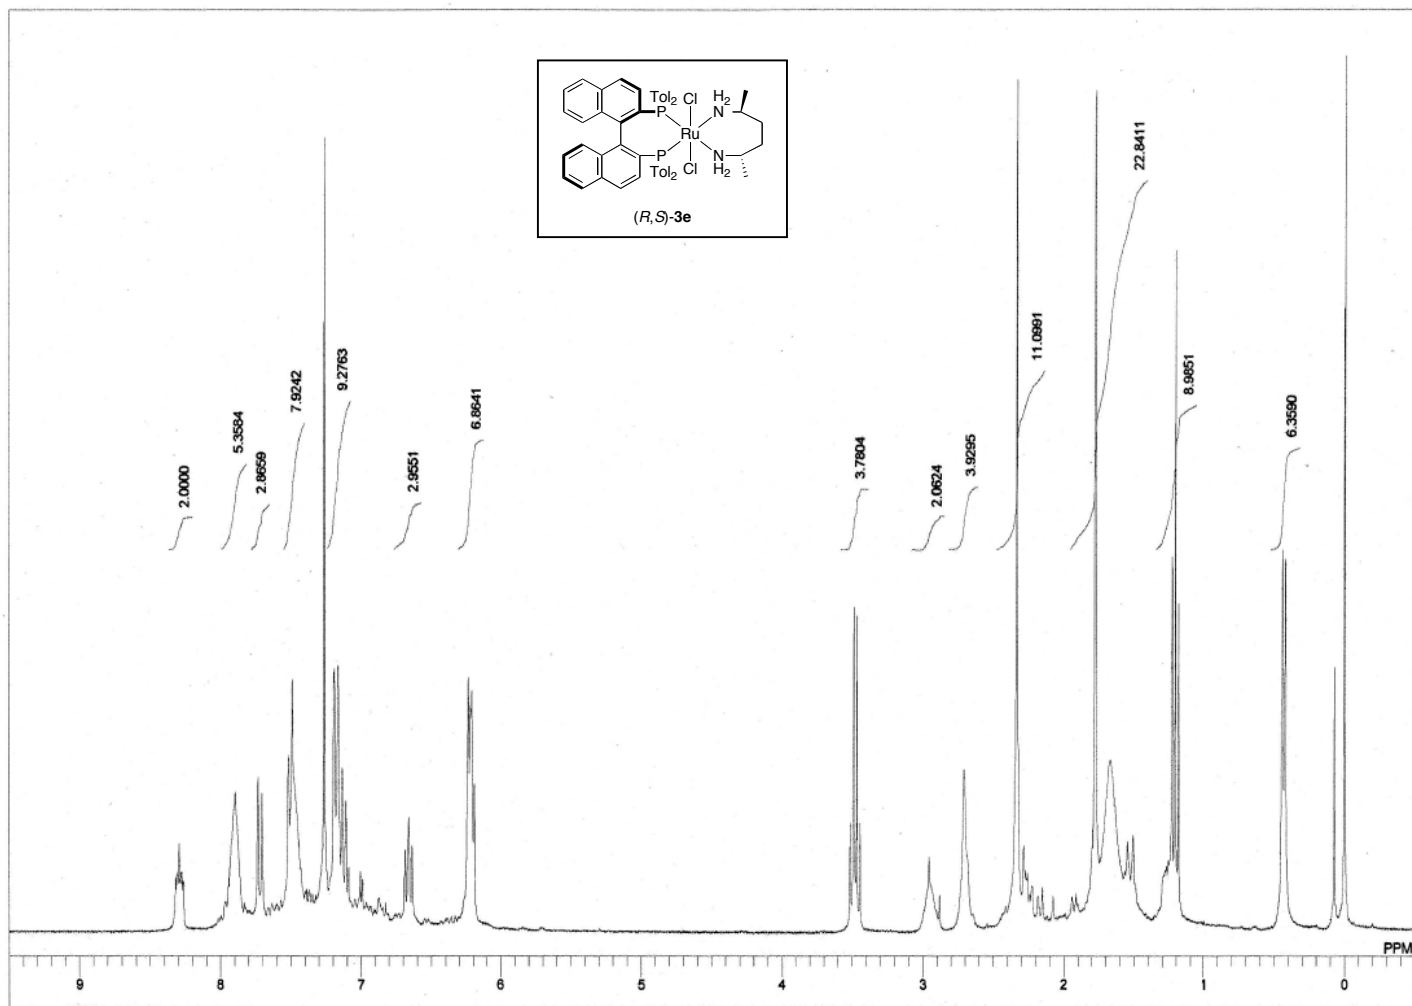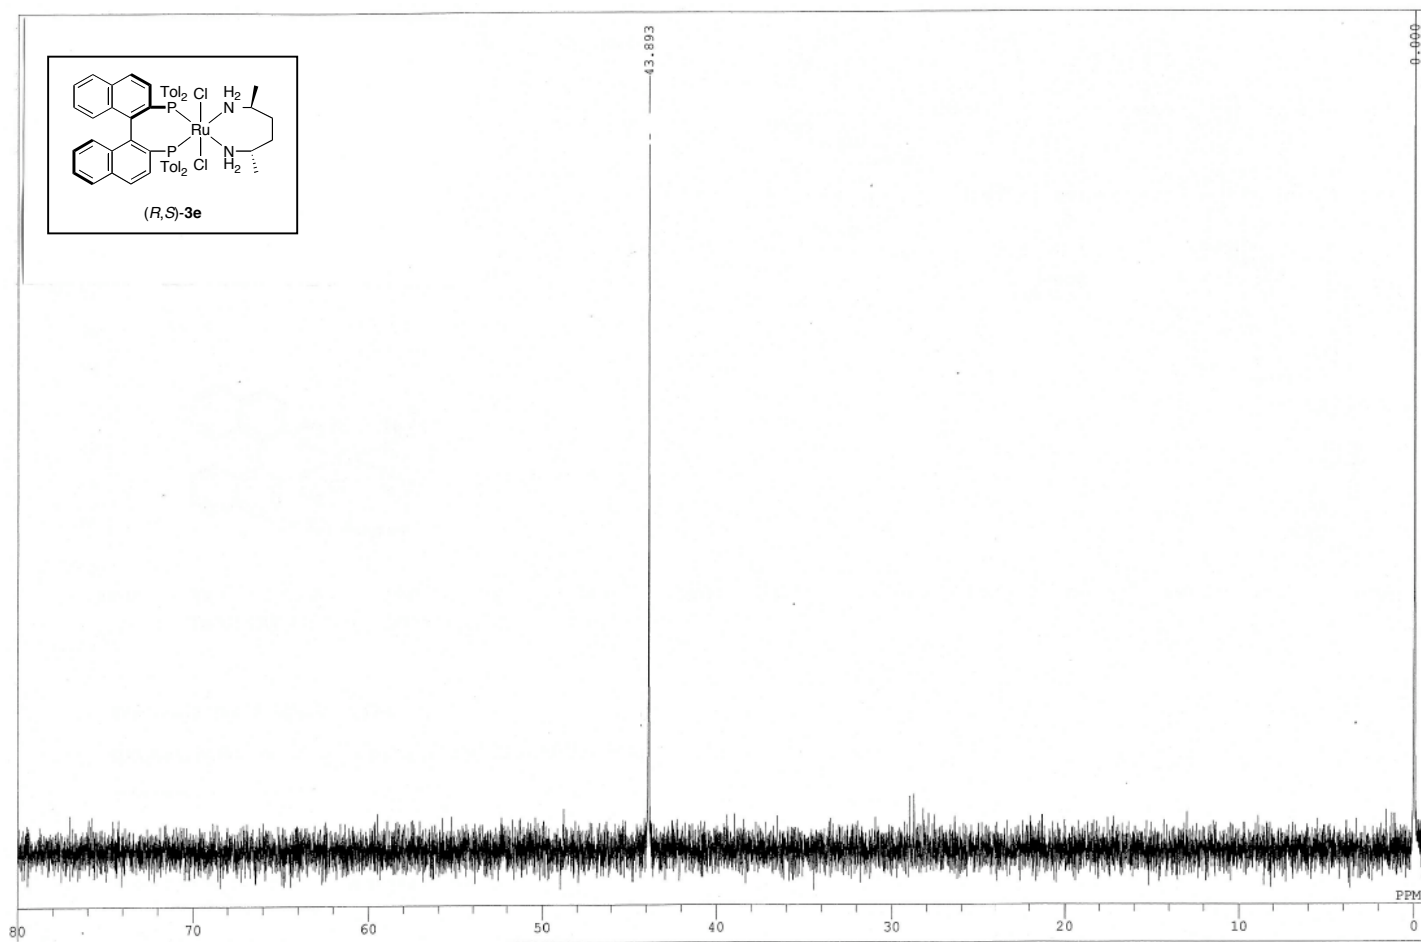

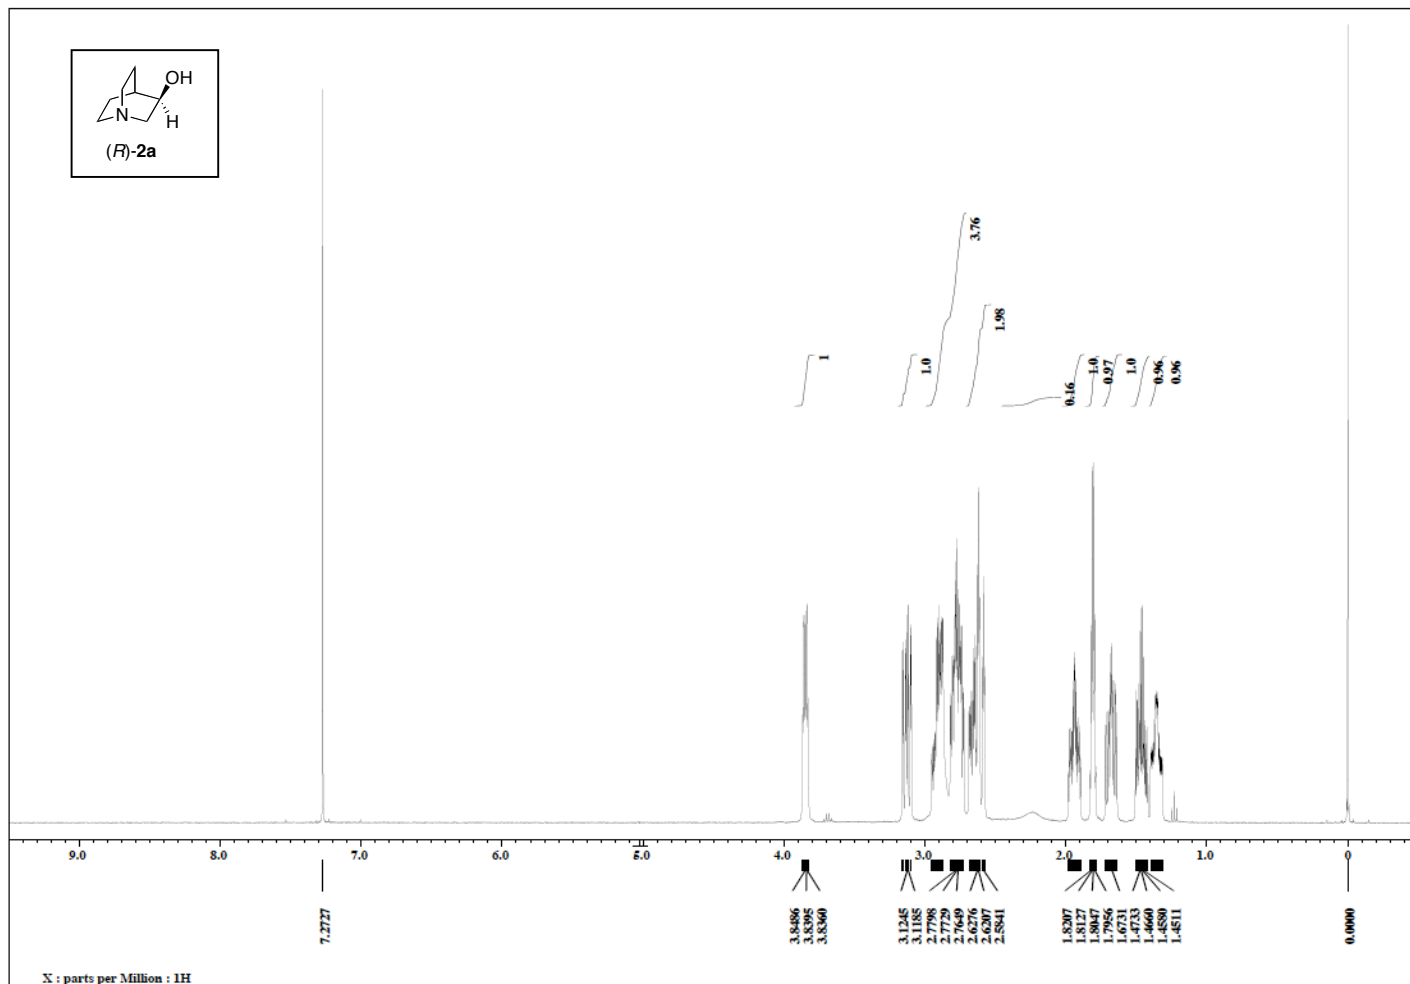

ss\_433 13C

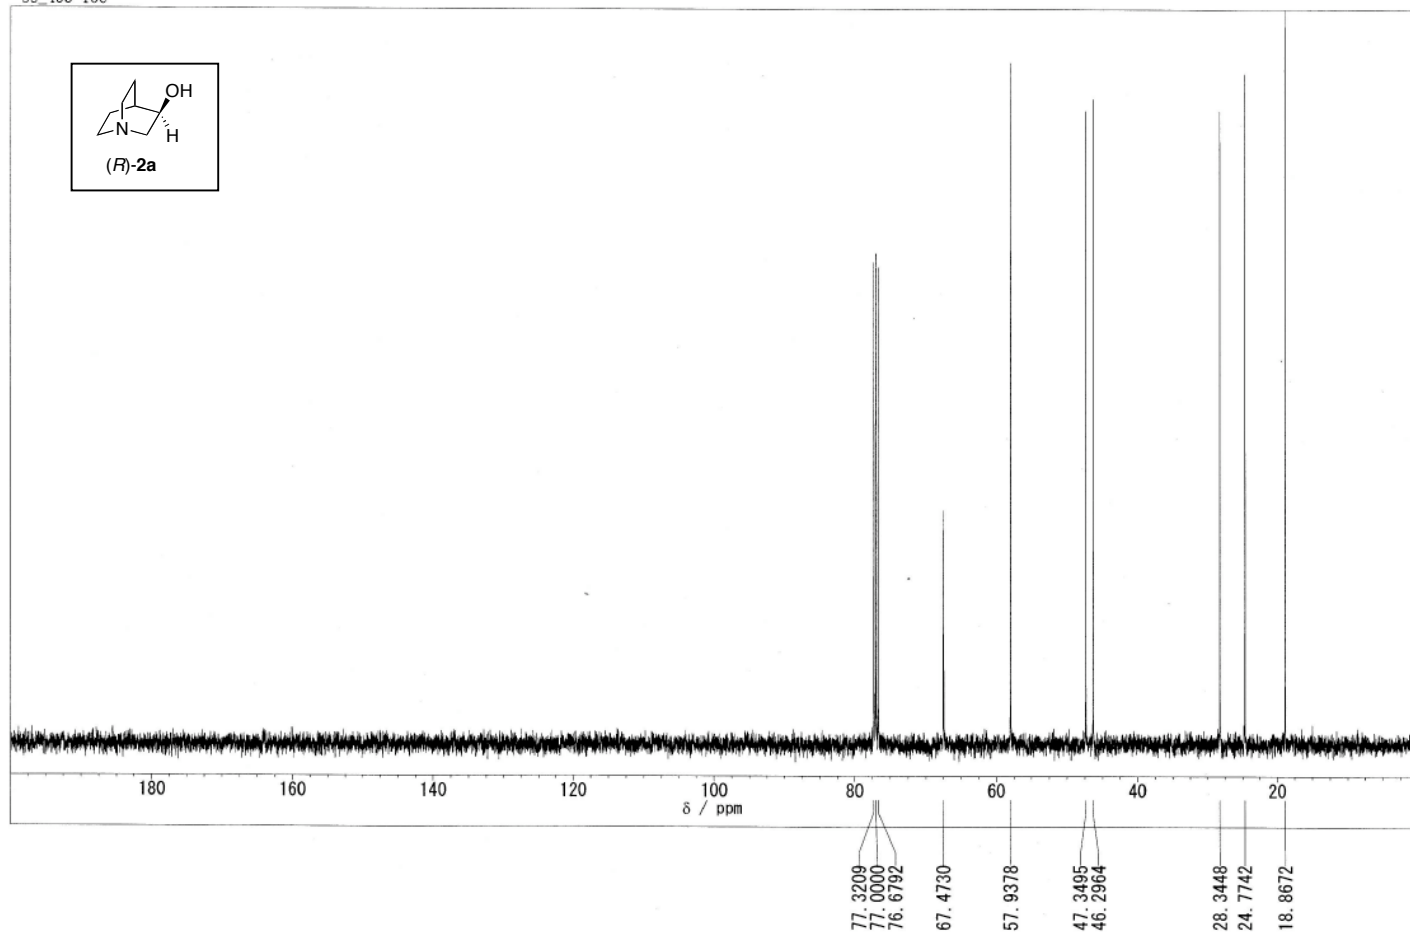

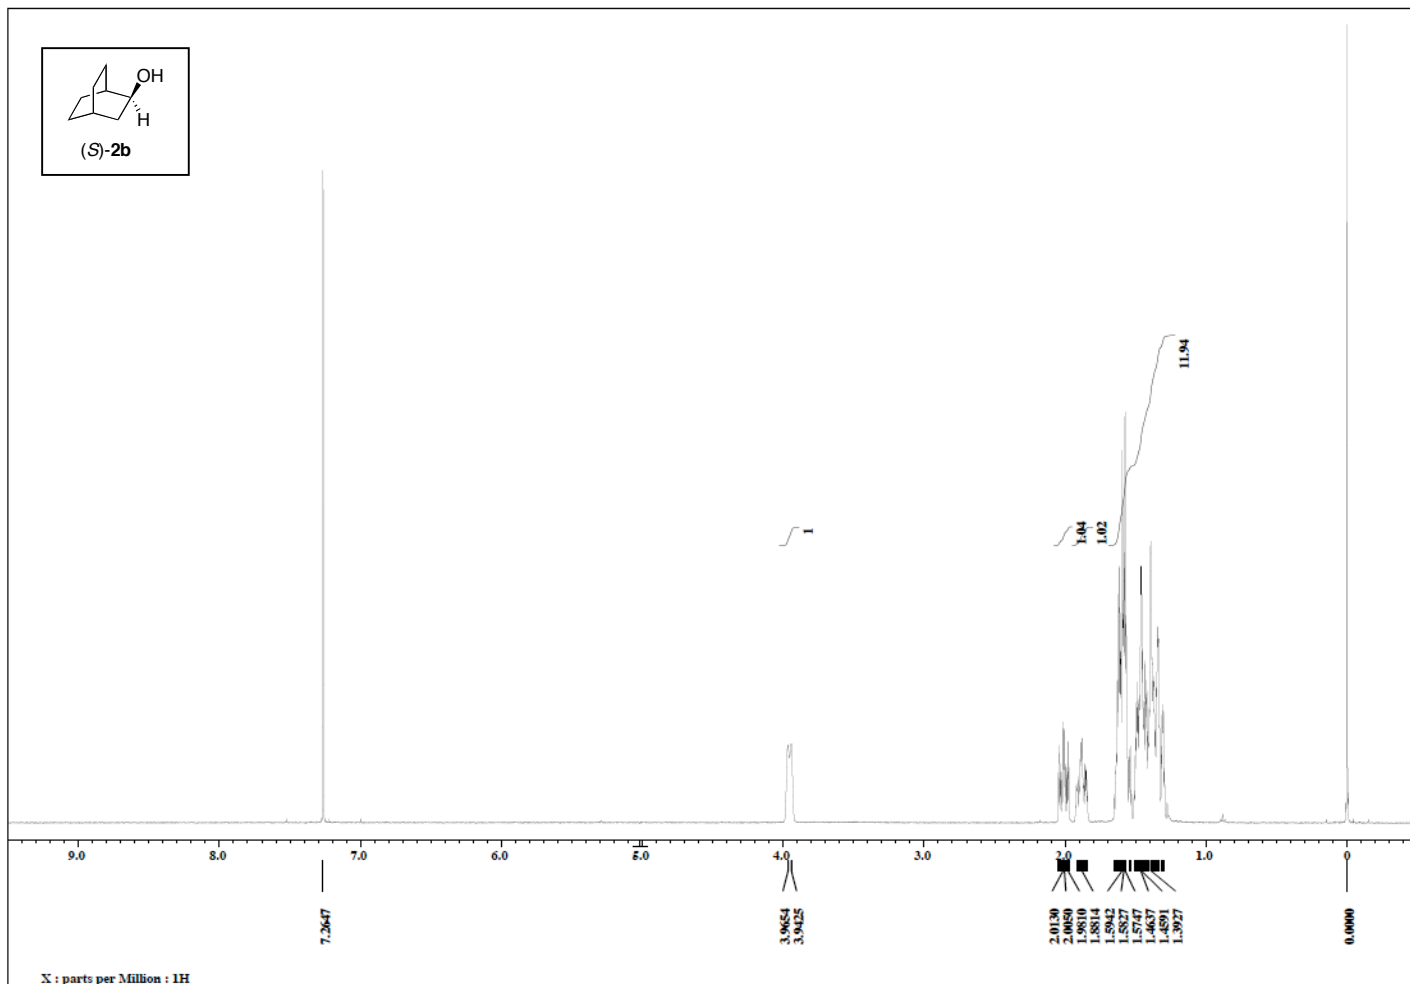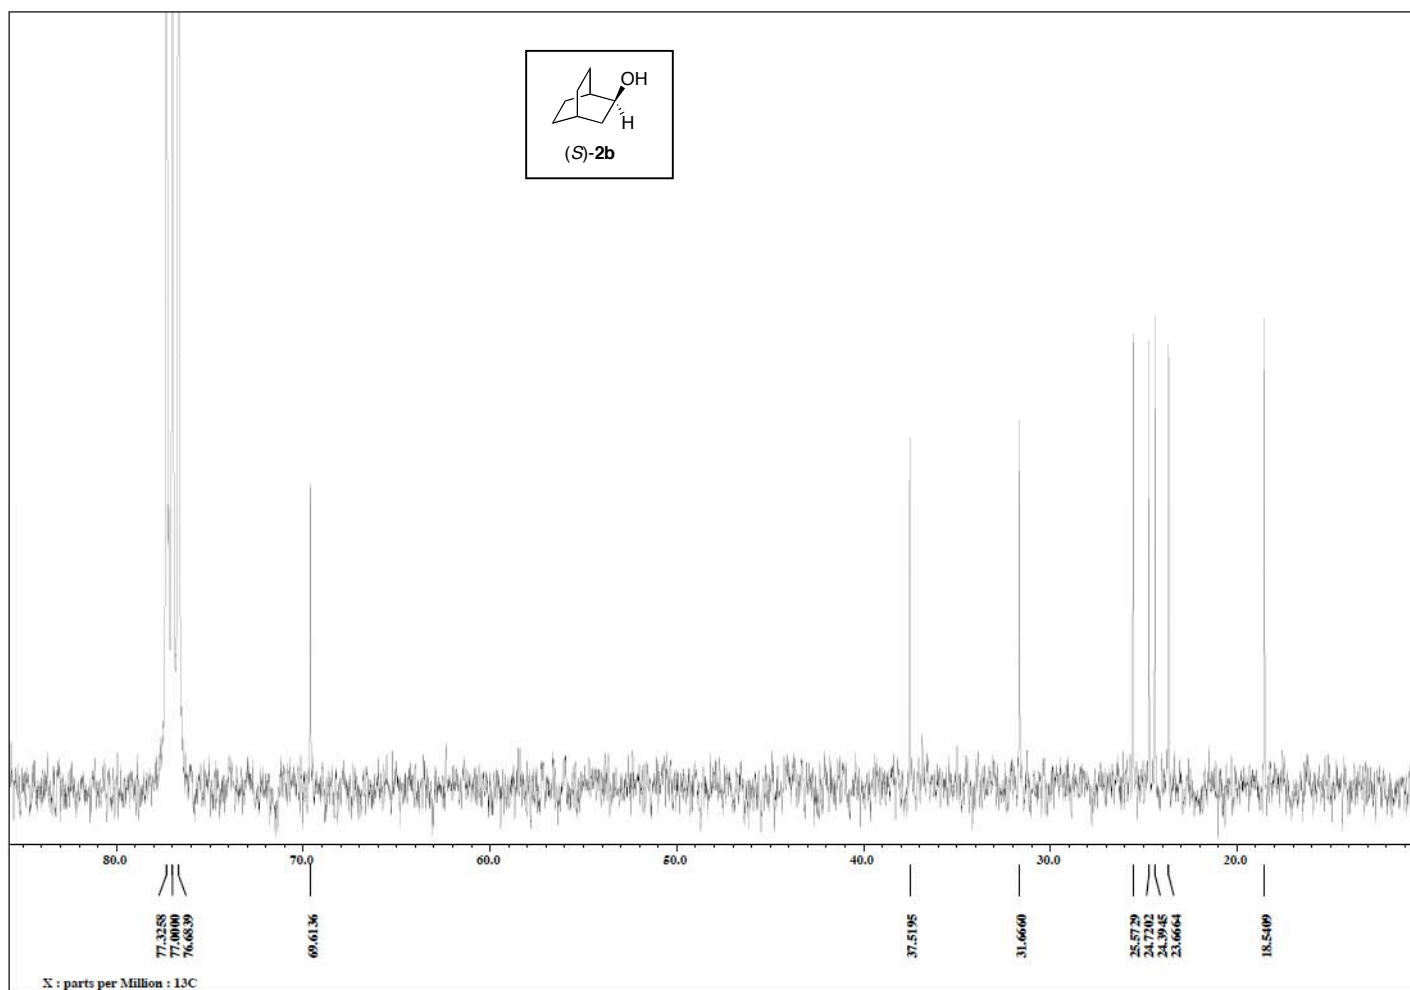

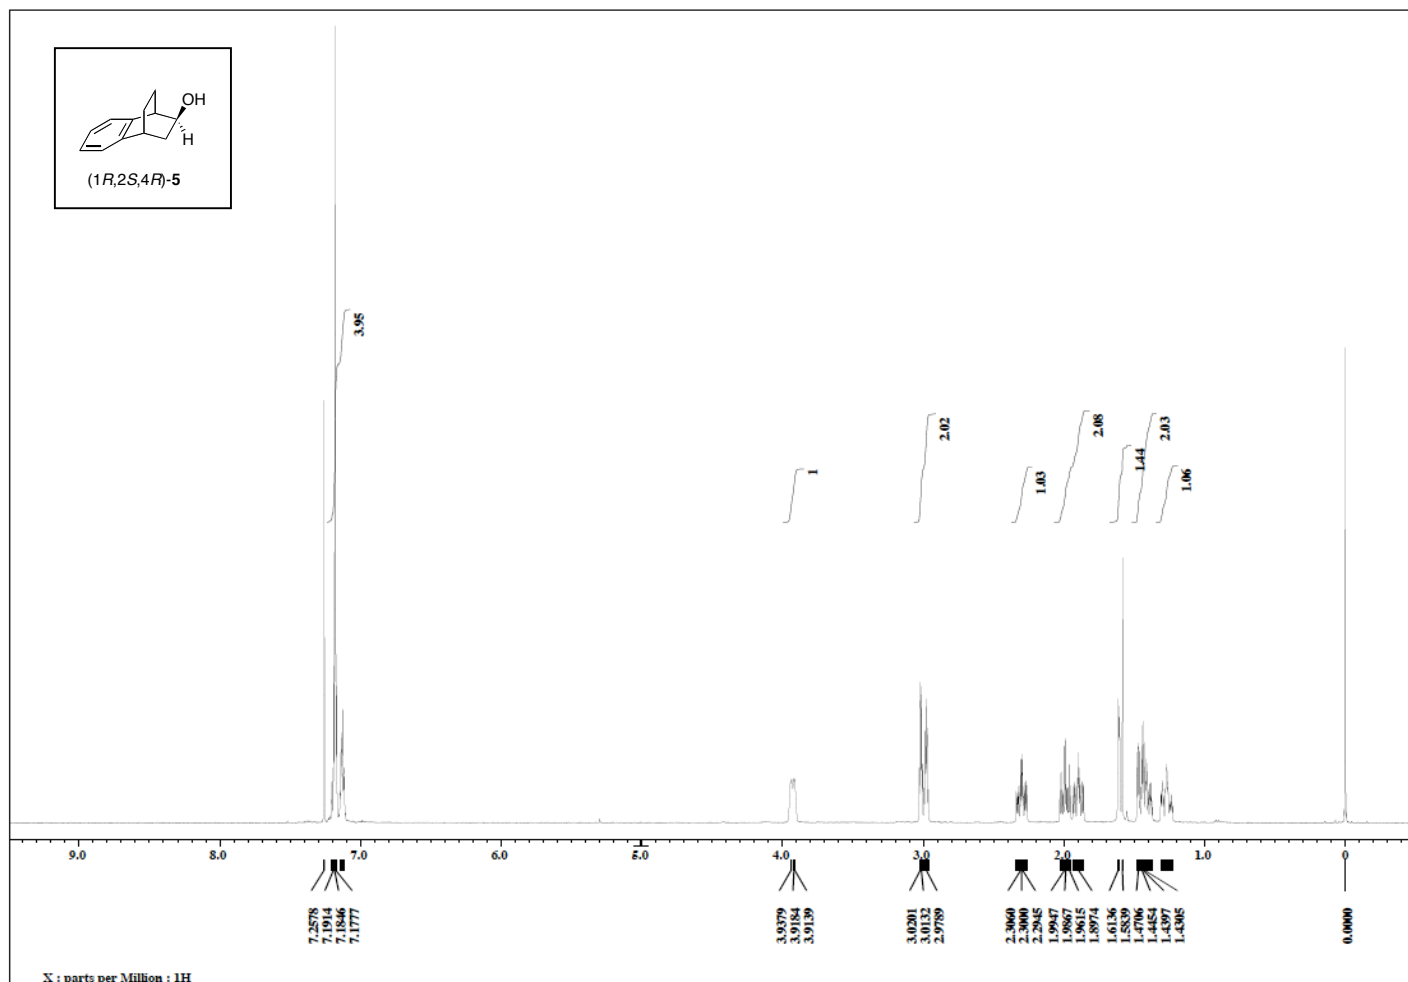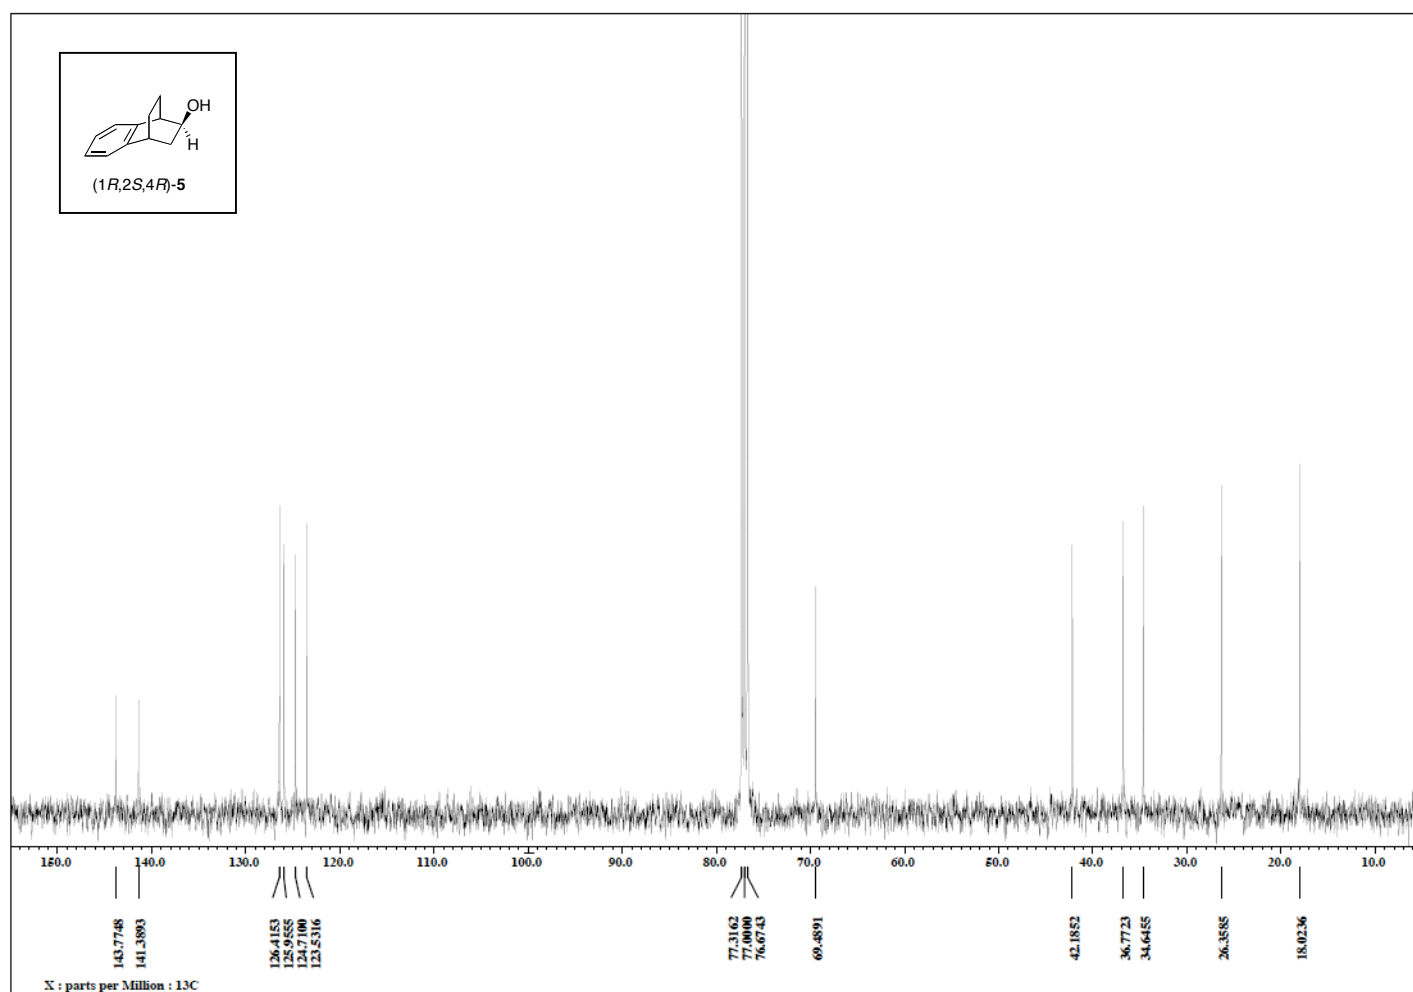

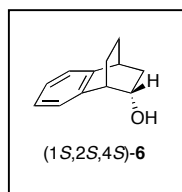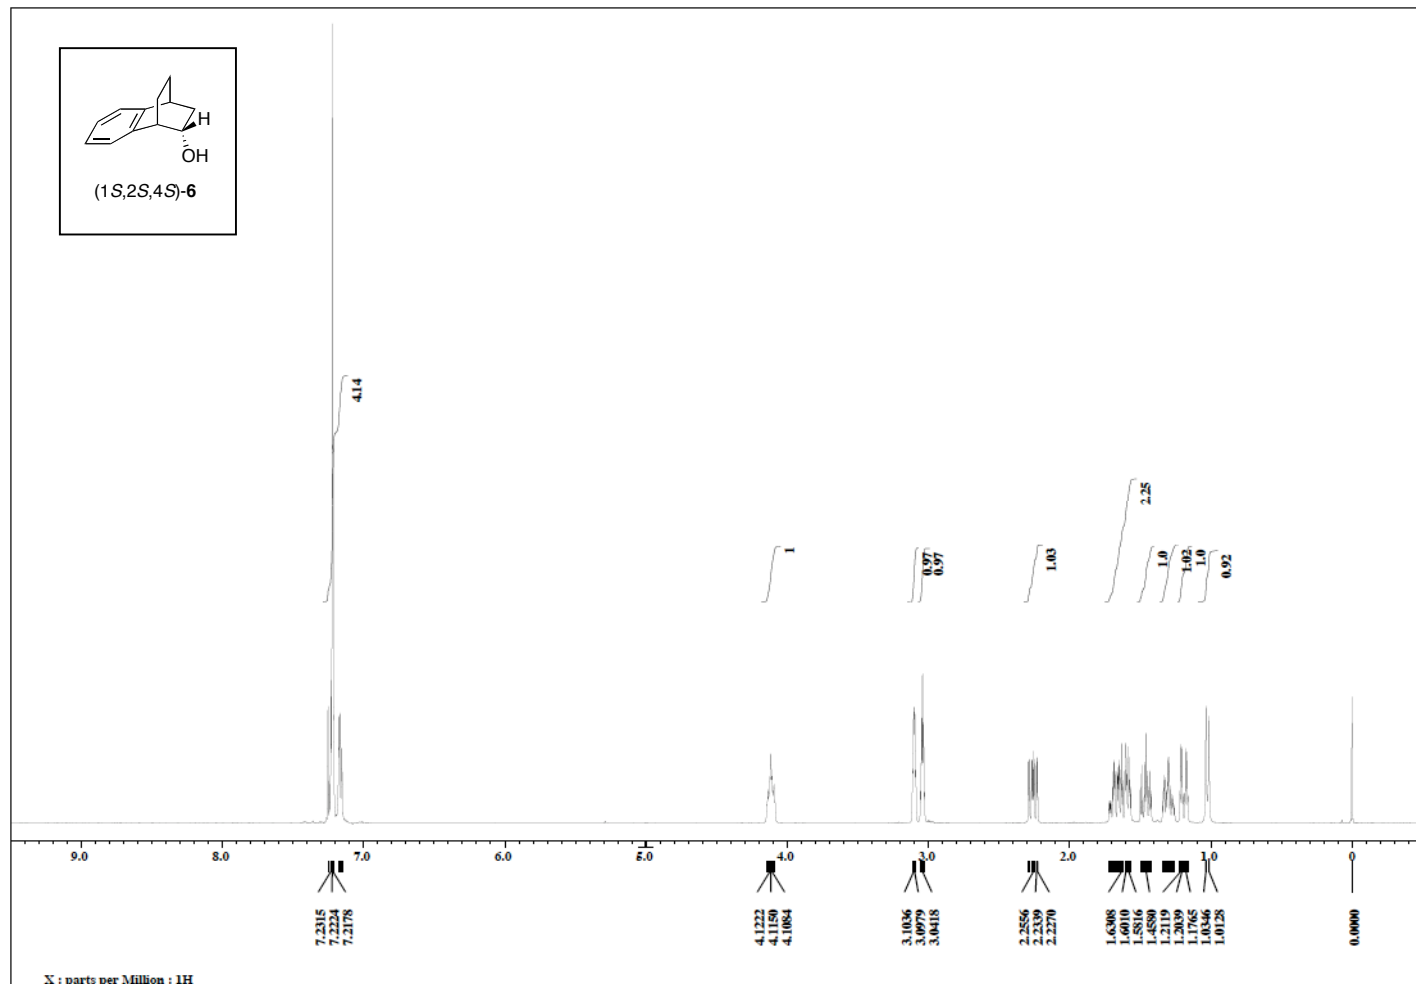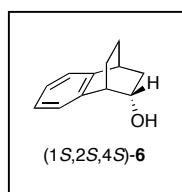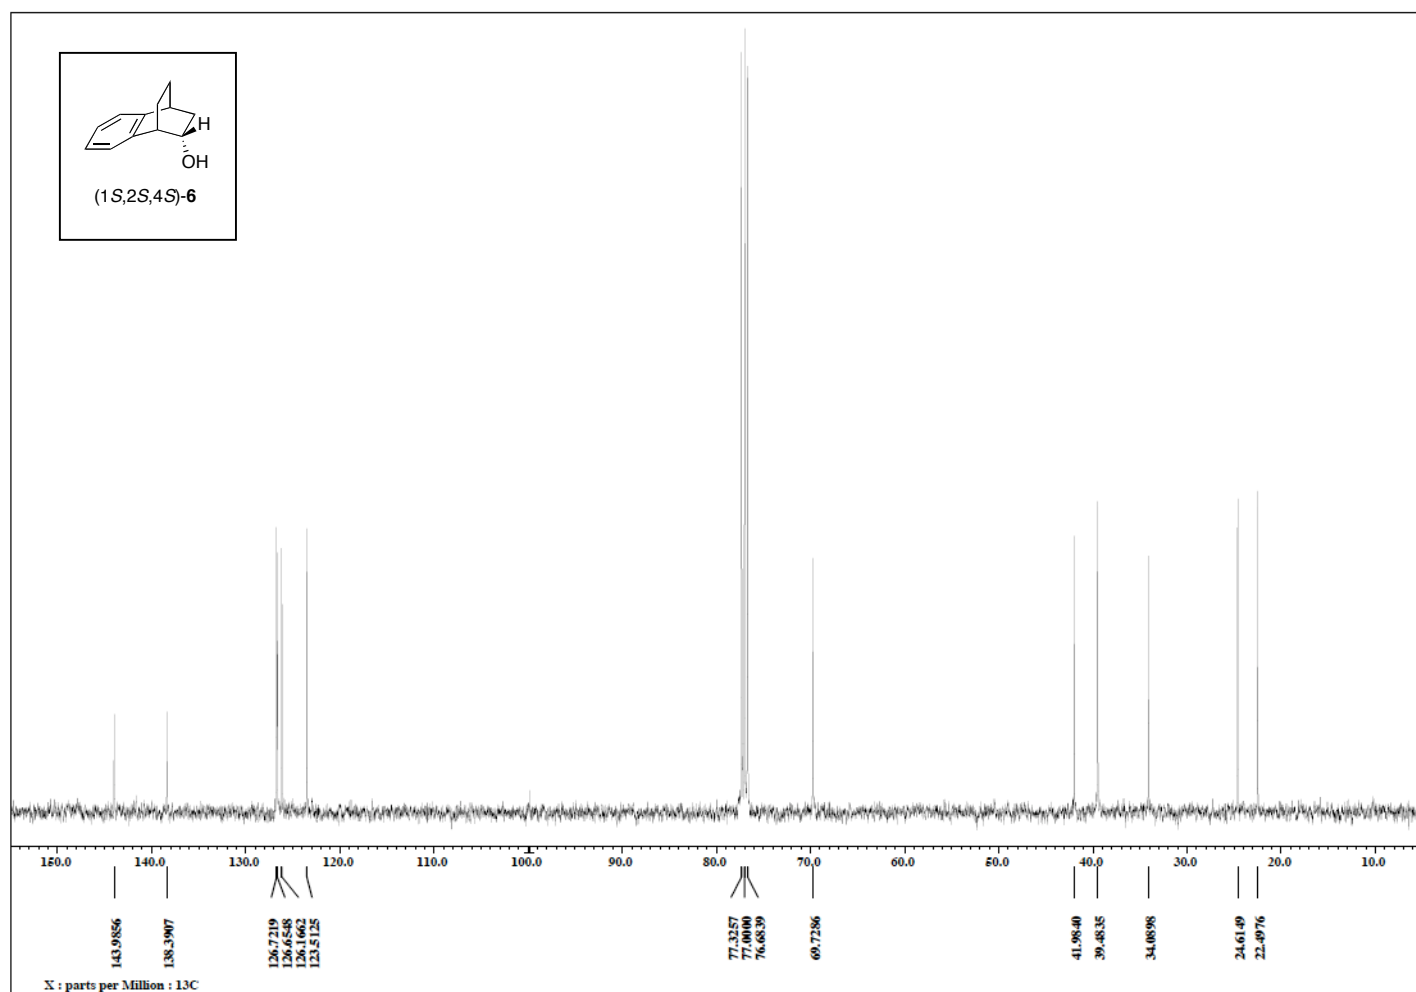

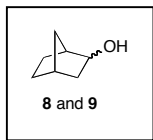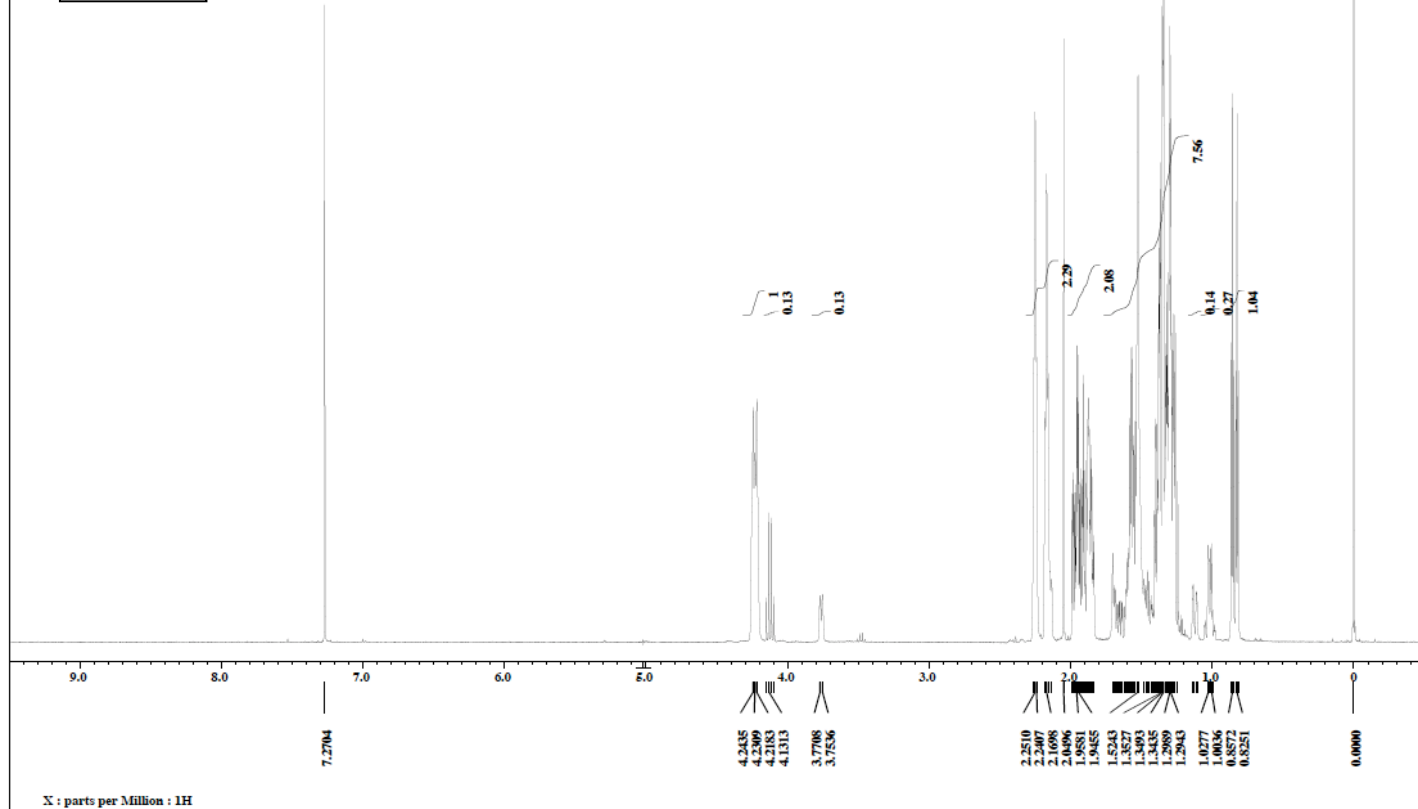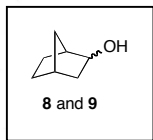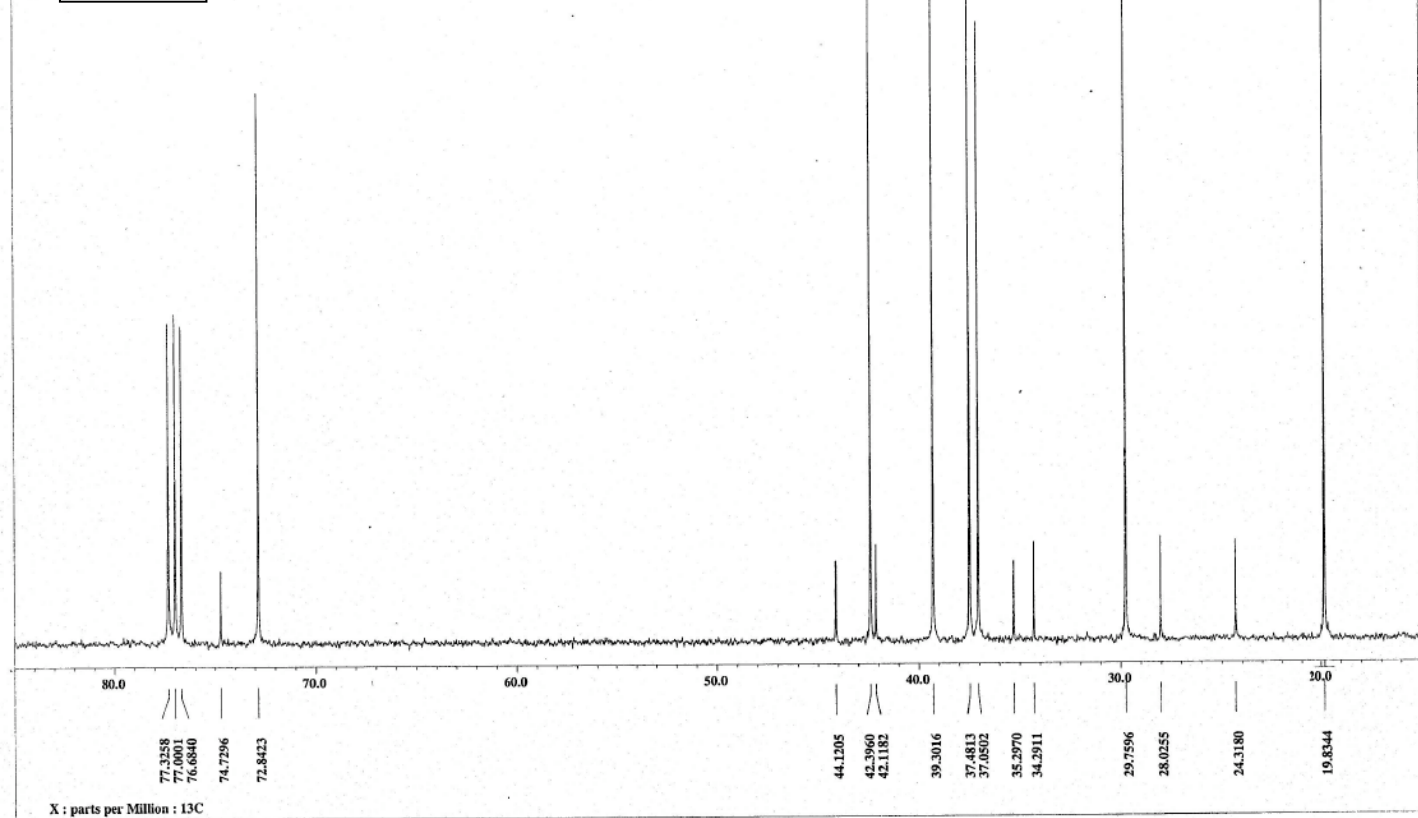

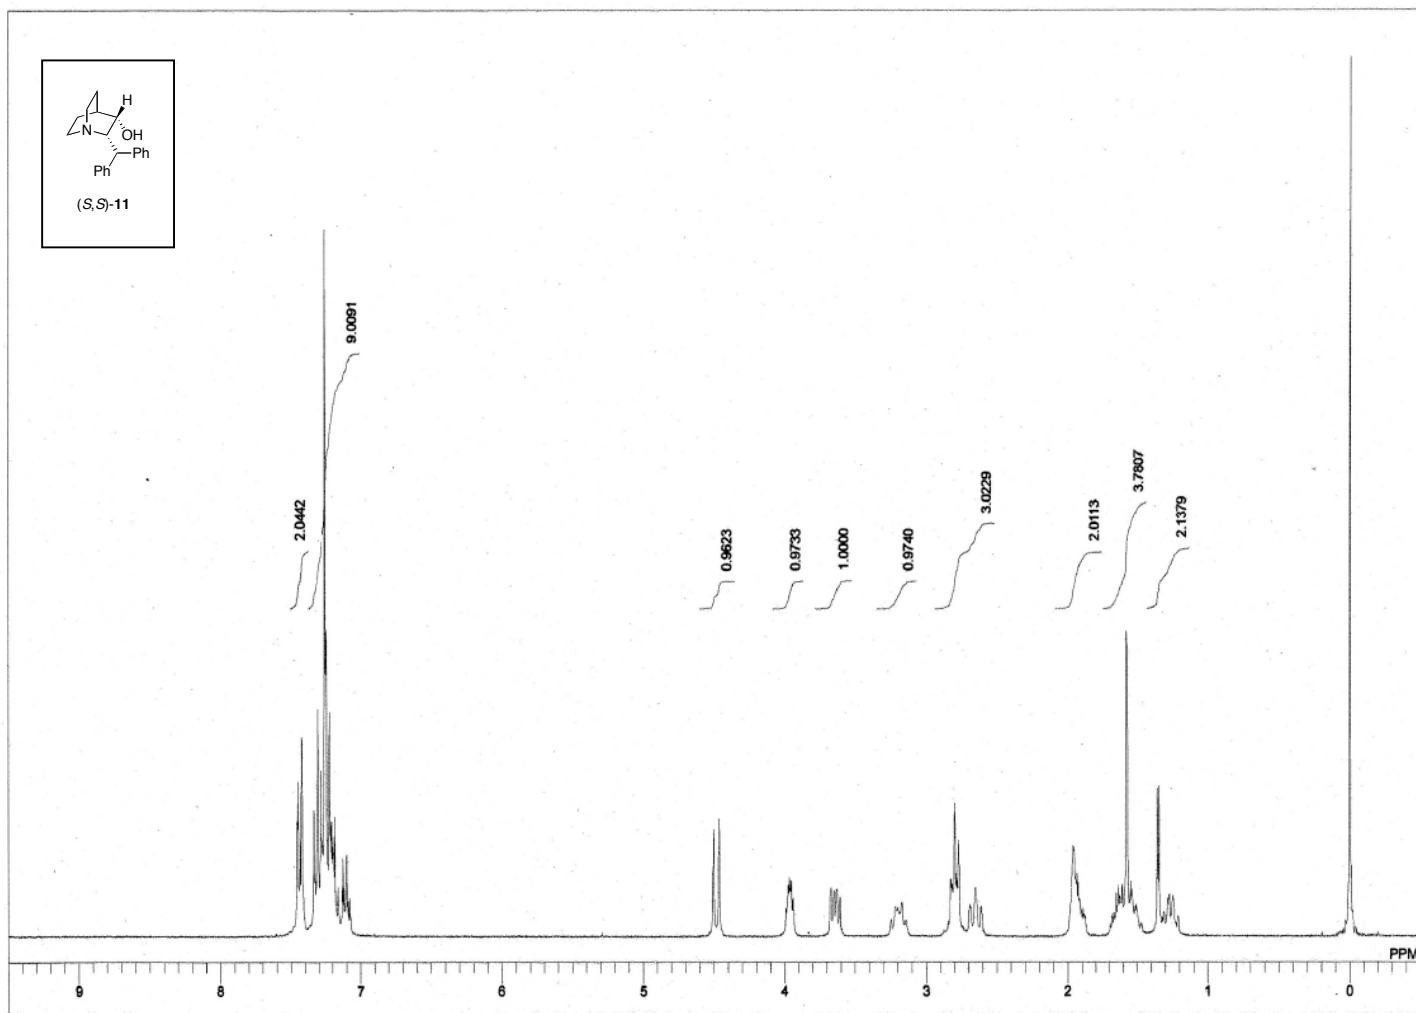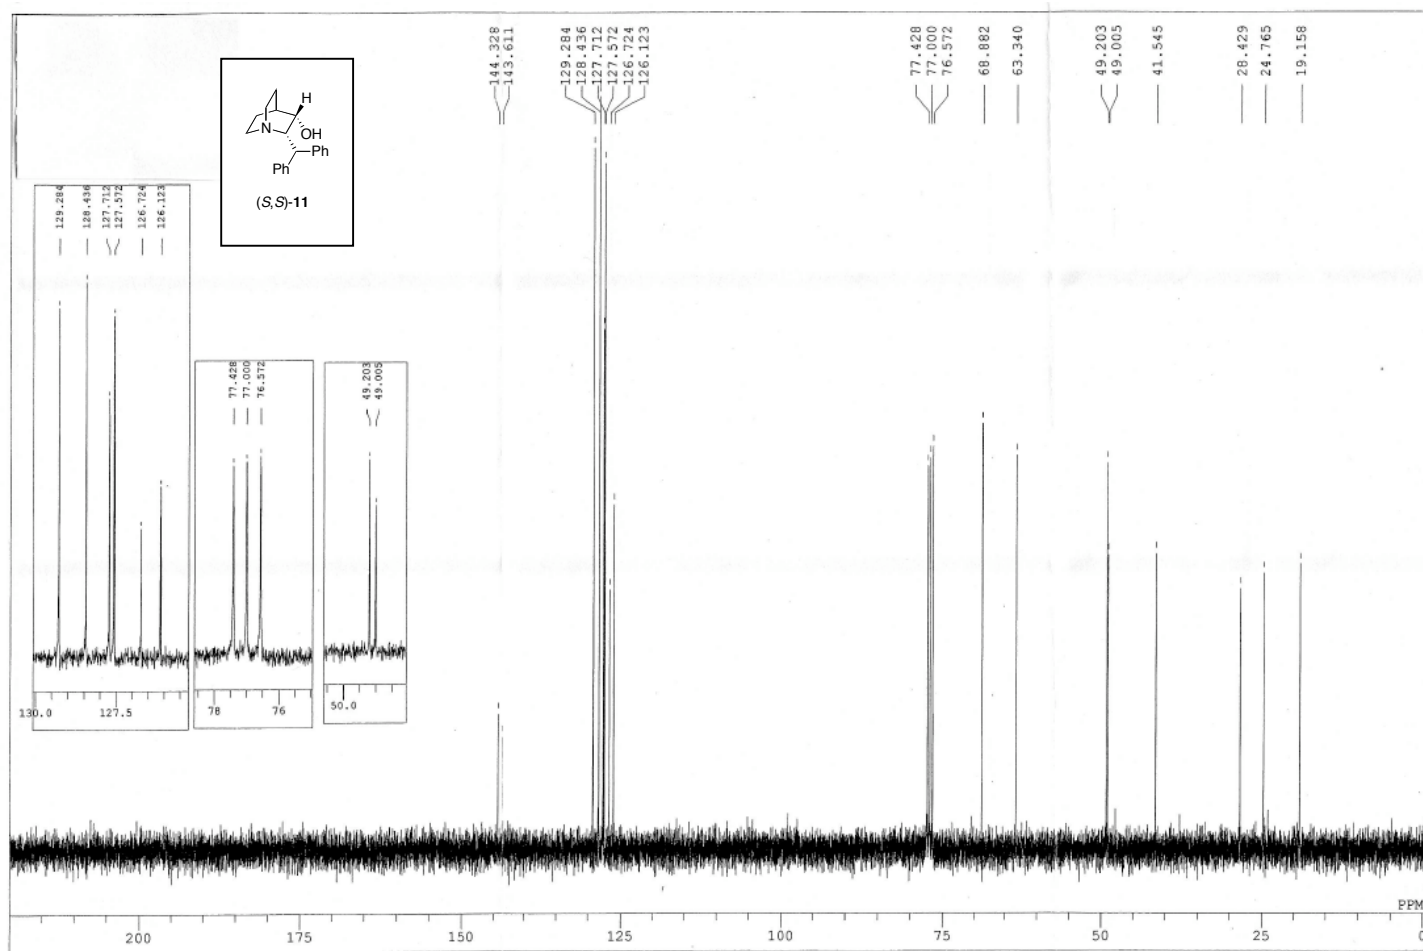

Supplement: Supplementary file 1 [file 4423783]
